# Supplementary material for: A Functional Taxonomy of Tumor Suppression in Oncogenic KRAS–Driven Lung Cancer
Source: Oxford University Press journal article supplement (doi:10.1158/2159-8290.cd-20-1325), 2021-02-19
Supplement: 21598290cd201325-sup-251240_2_supp_6912984_qbcdk6.xlsx [file 21598290cd201325-sup-251240_2_supp_6912984_qbcdk6.xlsx]

## Sheet: combined KRAS & EGFR
Supplementary Table 1. Mutation frequency of putative tumor suppressor genes across several human lung adenocarcinoma datasets. TRACERx data is from multi-region sequencing (at least 2 and up to 8 regions per tumor). Clonality was assessed as previously described (Jamal-Hanjani et al., 2017), using modified PyClone that considers the phylogenetic structure of multi-region data and takes into acco…
		TRACERx multiregion sequencing (N=61 patients)					GENIE - All lung adenocarcinoma		GENIE - KRAS mutant lung adenocarcinoma		TCGA - All lung adenocarcinoma (N=507 patients)			TCGA pan-cancer (N=9,892 patients)
Hugo_Symbol	Gene Description	Clonal Driver	Subclonal Driver	Clonal variant	Subclonal variant	Patients with mutations (%)	Mutations (Missense, frameshift, splice site, non-sense), # mutant sample/all samples analyzed	Samples with mutation (%)	Mutations (Missense, frameshift, splice site, non-sense)	Samples with mutation (%)	Mutations (Missense, frameshift, splice site, non-sense)	Deep deletion	Samples with mutation (%)	Mutations (Missense, frameshift, splice site, non-sense)	Deep deletion	Samples with mutation (%)		Role (Cosmic)	Background	Reasons for inclusion in Lenti-sgRNA/Cre pool	Likely pathway or function
ARHGAP35	Rho GTPase activating protein 35	3	1	0	0	6.55738	14/3651	0.383457	6/1275	0.470588	22	0	4.33925	360	24	4.20542	4	0		Mutation frequency >5% in at least one study.	Gene expression
ARID1A (BAF250A)	AT-rich interaction domain 1A	1	0	0	0	1.63934	269/3651	7.36784	96/1275	7.52941	32	2	6.90335	811	52	8.83542	3 over shallow deletion			Mutation frequency >5% in at least one study, BAF complex subunit.	Chromatin
ARID1B (BAF250B)	AT-rich interaction domain 1B	1	2	1	1	8.19672	143/3651	3.91674	46/1275	3.60784	28	5	6.50888	338	88	4.5188	3			Mutation frequency >5% in at least one study, BAF complex subunit.	Chromatin
ARID2 (BAF200)	AT-rich interaction domain 2	3	1	1	1	9.83607	169/3651	4.62887	49/1275	3.84314	26	6	6.70611	389	34	4.90295	5			Mutation frequency >5% in at least one study, BAF complex subunit.	Chromatin
ATF7IP	Activating transcription factor 7 interacting protein	0	1	0	0	1.63934	n/a	n/a	n/a	n/a	19	8	5.32544	226	43	3.49778	2	#N/A	c.egfr	Potential low-frequency subclonal driver gene	Chromatin
ATM	ATM serine/threonine kinase	2	1	2	0	8.19672	391/5161	7.57605	208/1834	11.3413	43	4	9.66469	544	78	6.65184	11	TSG	c.egfr	Mutation frequency >5% in at least one study, assessed previously in Rogers et al. (also see Figure S1).	DNA damage response
ATRX	ATRX, chromatin remodeler	2	1	0	0	4.91803	206/3651	5.64229	80/1275	6.27451	31	0	6.31164	626	51	7.02588	0			Mutation frequency >5% in at least one study.	Chromatin
BAP1	BRCA1 associated protein 1	1	2	0	0	4.91803	46/3651	1.25993	12/1275	0.941176	8	0	1.57791	243	73	3.37647	2			Established tumor suppressor in other cancer types.	Post-translational gene regulation (ubiquitin pathway)
BRCA2	Breast cancer 2, DNA repair associated	0	0	0	2	3.27869	173/3695	4.682	49/1280	3.82813	27	2	5.71992	441	70	5.74201	7			Established tumor suppressor in other cancer types, potential clinical importance.	DNA damage response
CDKN2A (INK4A/ARF)	Cyclin dependent kinase inhibitor 2A	5	0	0	0	8.19672	270/5161	5.23154	88/1834	4.79826	21	85	20.7101	400	1256	16.8419	6			Mutation frequency >5% in at least one study, larger percent of samples with likely homozygous deletions, assessed previously in Rogers et al. (also see Figure S1).	Cell cycle
CDKN2C	Cyclin dependent kinase inhibitor 2C	1	0	0	0	1.63934	17/3651	0.465626	4/1275	0.313725	0	4	1.38067	36	46	1.30408		TSG	c.egfr	Potential low-frequency driver gene.	Cell cycle
CIC	Capicua transcriptional repressor	0	2	0	0	3.27869	55/2263	2.4304	14/759	1.84453	10	0	2.95858	360	28	4.52891	1	onc/TSG/fusion	c.egfr	Potential low-frequency subclonal driver gene.	Gene expression
CMTR2	Cap methyltransferase 2	3	0	0	0	4.91803	n/a	n/a	n/a	n/a	28	2	5.91716	138	59	2.27457				Potential low-frequency clonal driver gene.	RNA modification and processing
DNMT3A	DNA methyltransferase 3 alpha	1	0	0	0	1.63934	123/3651	3.36894	53/1275	4.15686	21	0	4.73373	245	15	3.05297		TSG	c.kras	Potential low-frequency driver gene (also see Figure S1).	DNA methylation
DOT1L	DOT1 like histone lysine methyltransferase	1	1	1	0	4.91803	56/1910	2.93194	15/612	2.45098	15	3	3.5503	189	67	3.12374	6	#N/A	c.egfr	Potential low-frequency driver gene.	DNA methylation
EP300	E1A binding protein p300	0	2	0	1	4.91803	116/3651	3.17721	45/1275	3.52941	11	2	2.76134	429	25	4.91306	0	TSG/fusion	c.kras	Potential low-frequency subclonal driver gene.	Chromatin
ERCC4	ERCC excision repair 4, endonuclease catalytic subunit	0	0	1	0	1.63934	74/3626	2.04082	34/1268	2.68139	9	0	2.36686	135	2	2.19369	0			Potential low-frequency driver gene.	DNA damage response
FAT1	FAT atypical cadherin 1	2	1	0	1	6.55738	195/2219	8.78774	74/743	9.95962	52	12	12.2288	689	214	9.17913	7			Mutation frequency >5% in at least one study, suspected inert passenger based on length and other genomic and mutational features. tumor suppressor in genetic models.	Cell-cell signalling
FBXW7	F-box and WD repeat domain containing 7	2	0	0	0	3.27869	95/5161	1.84073	35/1834	1.9084	11	1	2.5641	450	63	5.51961	1			Potential low-frequency clonal driver gene.	Post-translational gene regulation (ubiquitin pathway)
GATA3	GATA binding protein 3	0	1	0	2	4.91803	65/3651	1.78033	23/1275	1.80392	14	1	3.5503	255	21	3.93247	1	1.9	3	Potential low-frequency subclonal driver gene.	Gene expression
KDM6A	lysine demethylase 6A	0	0	0	0	0	88/3651	2.4103	37/1275	2.90196	14	5	4.53649	351	122	5.30732	1			Potential low-frequency driver gene (also see Figure S1).	Chromatin
KEAP1	Kelch Like ECH Associated Protein 1	9	0	0	0	14.7541	492/3336	14.7482	220/1155	19.0476	95	4	19.5266	268	17	4.13465	29			Mutation frequency >10% in at least one study.	Gene expression
KMT2C (MLL3)	Lysine methyltransferase 2C (MLL3)	2	0	0	1	4.91803	114/1967	5.79563	36/628	5.73248	69	0	14.9901	897	79	10.6753	12			Mutation frequency >5% in at least one study, established tumor suppressor in other cancer types, suspected inert passenger based on length and other genomic and mutational features.	Chromatin
KMT2D (MLL2)	Lysine methyltransferase 2D (MLL2)	1	2	0	1	6.55738	301/3651	8.24432	96/1275	7.52941	38	0	8.08679	954	15	10.0283	2	oncogene/TSG	c.kras	Mutation frequency >5% in at least one study, established tumor suppressor in other cancer types, suspected inert passenger based on length and other genomic and mutational features.	Chromatin
LATS1	Large tumor suppressor kinase 1	0	1	0	0	1.63934	32/1805	1.77285	6/588	1.02041	15	3	3.5503	208	54	2.98221		2.1	4	Potential low-frequency driver gene, also implicated by genetic and biochemistry evidence.	Hippo signaling
LRP1B	LDL Receptor Related Protein 1B	4	0	13	13	49.1803	31/124	25	9/33	27.2727	176	16	36.6864	1239	422	16.3971				Mutation frequency >20% in at least one study, however is suspected inert passenger based on length and other genomic and mutational features.	Ligand receptor signalling
MGA	MAX dimerization protein MGA	6	1	0	0	11.4754	99/1838	5.38629	45/648	6.94444	44	11	10.4536	423	77	5.08492		#N/A	c.egfr, c.kras	Mutation frequency >5% in at least one study, implicated by genetics in multiple cancer types.	Gene expression
NCOA6	Nuclear receptor coactivator 6	2	1	2	0	8.19672	n/a	n/a	n/a	n/a	18	0	4.53649	256	6	4.11444		#N/A	c.egfr	Mutation frequency >5% in at least one study.	Gene expression
NCOR1	Nuclear receptor corepressor 1	1	2	0	0	4.91803	43/1910	2.25131	12/612	1.96078	21	3	5.12821	389	73	5.13546		TSG	c.egfr	Potential low-frequency driver gene.	Ligand receptor signalling
NF1	Neurofibromin 1	4	3	1	0	13.1148	253/3714	6.81206	71/1289	5.50815	61	2	12.8205	644	100	8.11767		TSG/fusion	c.egfr	Mutation frequency >10% in atleast one study, established tumor suppressor in other cancer types, potential subclonal driver (also see Figure S1).	Ras signaling
NF2	Neurofibromin 2 (Merlin)	0	0	0	0	0	39/3651	1.0682	12/1275	0.941176	6	2	2.16963	155	37	2.58795				Potential low-frequency driver gene. Component of potentially important signalling pathway.	Hippo signaling
POLE	DNA polymerase epsilon, catalytic subunit	1	0	0	1	3.27869	76/2219	3.42497	39/743	5.24899	28	3	6.31164	344	36	4.28629				Mutation frequency >5% in at least one study, frequent hotspot mutations, unclear tumor suppressive function.	DNA damage response and replication
PTEN	Phosphatase and tensin homolog	0	0	0	0	0	120/5271	2.27661	27/1868	1.4454	7	5	2.36686	849	429	12.7376				Established tumor suppressor in other cancer types (also see Figure S1).	PI3K signaling
PTPRD	Protein tyrosine phosphatase, receptor type D	0	0	3	4	11.4754	315/2914	10.8099	131/996	13.1526	84	41	24.0631	505	391	10.0789				Mutation frequency >5% in atleast one study, larger percent of samples with likely homozygous deletion.	Receptor-type protein tyrosine phosphatase signalling
RASA1	RAS p21 protein activator 1	2	0	0	0	3.27869	32/2139	1.49603	7/726	0.964187	10	5	2.95858	253	73	3.32592				Potential low-frequency clonal driver gene.	Ras signaling
RB1	RB transcriptional corepressor 1	3	2	0	0	8.19672	189/5161	3.66208	43/1834	2.3446	29	9	7.29783	446	304	7.55156		TSG	c.egfr	Mutation frequency >5% in atleast one study, assessed previously in Rogers et al. (also see Figure S1).	Cell cycle
RBM10	RNA binding motif protein 10	4	0	1	0	8.19672	178/2219	8.02163	85/743	11.4401	38	2	8.87574	183	52	3.23494				Mutation frequency >5% in atleast one study, assessed previously in Rogers et al.	RNA modification and processing
RNF43	Ring finger protein 43	1	1	0	0	3.27869	31/2244	1.38146	11/750	1.46667	6	0	2.16963	252	23	4.19531		0	c.kras	Potential low-frequency driver gene. Component of potentially important signalling pathway.	Wnt signalling
SETD2	SET domain containing 2	1	0	0	0	1.63934	246/3651	6.73788	79/1275	6.19608	37	1	7.49507	438	57	5.08492				Mutation frequency >5% in atleast one study, assessed previously in Rogers et al. (also see Figure S1).	Chromatin
SMAD4	SMAD family member 4	0	2	0	0	3.27869	204/5161	3.95272	54/1834	2.94438	24	10	6.50888	279	157	4.39749	8	TSG	c.egfr	Mutation frequency >5% in atleast one study, assessed previously in Rogers et al., potential subclonal driver. Component of potentially important signalling pathway.	TGFbeta signaling, gene expression
SMARCA4 (BRG1)	SWI/SNF related, matrix associated, actin dependent regulator of chromatin, a4	1	1	0	1	4.91803	295/3651	8.07998	111/1275	8.70588	45	5	9.86193	401	32	5.7218		0	c.kras	Mutation frequency >5% in atleast one study	Chromatin
STAG2	Stromal antigen 2	0	1	0	1	3.27869	99/3632	2.72577	48/1266	3.79147	21	0	5.12821	283	24	3.6292	3			Potential low-frequency driver gene. Cohesin complex component, established tumor suppressor in other cancer types (personal interest).	DNA replication
STK11 (LKB1)	Serine threonine kinase 11 (Liver Kinase B1)	6	1	0	0	11.4754	599/5161	11.6063	331/1834	18.048	77	3	15.7791	163	78	2.92155				Established tumor suppressor in multiple cancer types. Mutation frequency >5% in at least one study, assessed previously in Rogers et al. (also see Figure S1)	AMP-activated protein kinase signalling in multiple pathways
TET2	Tet methylcytosine dioxygenase 2	0	0	2	0	3.27869	145/3651	3.97151	44/1275	3.45098	9	0	1.97239	237	18	2.73959				Potential low-frequency driver gene. Component of potentially important cellular process.	RNA modification and processing
TP53	Tumor protein p53	25	4	0	0	47.541	2411/5271	45.7408	620/1868	33.1906	263	6	52.071	3786	122	39.1124		oncogene/TSG	c.egfr, c.kras	Established tumor suppressor in multiple cancer types. Mutation frequency >20% in at least one study, assess previously in Rogers et al. (also see Figure S1).	Gene expression
TSC1	Tuberous sclerosis 1	0	0	1	1	3.27869	63/3714	1.69628	32/1289	2.48254	7	1	1.57791	198	38	2.85079				Established tumor suppressor in multiple cancer types, though low frequency in lung cancers.	mTOR signalling
UBR5	Ubiquitin protein ligase E3 component n-recognin 5	1	1	1	2	8.19672	n/a	n/a	n/a	n/a	29	0	10.4536	385	6	8.19854		0	c.kras	Mutation frequency >5% in at least one study	Post-translational gene regulation (ubiquitin pathway)
WRN	Werner syndrome RecQ like helicase	1	1	1	0	4.91803	56/1741	3.21654	25/663	3.77074	18	24	8.08679	203	228	4.7311		0	c.egfr	Mutation frequency >5% in at least one study, larger percent of samples with likely homozygous deletion.	DNA damage response and replication
