# Supplementary material for: A Functional Taxonomy of Tumor Suppression in Oncogenic KRAS–Driven Lung Cancer
Source: Oxford University Press journal article supplement (doi:10.1158/2159-8290.cd-20-1325), 2021-02-19
Supplement: 21598290cd201325-sup-251240_2_supp_6912985_qrcdk6.xlsx [file 21598290cd201325-sup-251240_2_supp_6912985_qrcdk6.xlsx]

## Sheet: Guides
Supplementary Table 2. sgRNA vectors in the high content Lenti-sgTS102/Cre pool.
All sgRNAs were designed using Desktop Genetic's Guide Picker tool (Hough et al. 2017, https://www.deskgen.com/guide-picker), unless otherwise indicated by the reference after the sgRNA_ID. All possible guide sequences with suitable SpCas9 PAM site within target gene were filtered to prioritise on-target activity and specificity scores (minimum thresholds applied to the scores), no homopolymer ru…
Strand_orientation, Chromosome_name, Coordinate_start, Coordinate_end are from mouse reference GRCm38.81
Guide_sequence, sgRNA sequence without the PAM motif.
Activity_score_Doench2016_full, on-target activity taking into account peptide position, scored according to Doench et al., 2016. Threshold of 0.6 applied when filtering suitable guides.
Microhomology_score_Bae2014, score predicting likelihood of frame-shift mutation arising from non-homologous end joining (NHEJ) repair, scored according to Bae et al., 2014. Threshold of 0.6 applied when filtering suitable guides.
Off_target_score_Hsu2013, specificity score assessing off-target activity, scored according to Hsu et al., 2013. Threshold of 0.6 applied when filtering suitable guides. The strongest exome off-target in this library detected in GRCm38 refseq is Kdm6a#2 potentially targeting Tcte1 (3 mismatches, specificity score of 2.6/100)
Bacteria_colony_number_estimate, estimated number of colonies in the pool of transformed bacteria, corresponding to the number of unique molecules and Tumour ID sequences in the preparation of lentiviral packaging plasmid.
BaeI_F_oligo and BaeI_R_oligo, forward and reverse synthetic oligonucleotides annealed together to generate sgRNA fragment for ligation into the vector
Barcode_F_seq, forward primer sequence containing the sgRNA_ID and the 20N degenerate barcode sequence, used with reverse primer AGCTAGGGATCCGCCGCATAACCAGTG to generate the barcode fragment
Target_Enrichment_Forward_Primer and Target_Enrichment_Reverse_Primer, forward and reverse primers used to PCR amplify the genomic DNA region that contains the sgRNA target site. The length and reference sequences of amplicons are shown in Target_Enrichment_Amplicon_Length and Target_Enrichment_Reference_Sequence
Ensembl_Gene_ID	Gene_symbol	sgRNA_No.	sgRNA_ID	8bp_sgID_sequence	Strand_orientation	Chromosome_name	Coordinate_start	Coordinate_end	Guide_sequence	Activity_score_Doench2016_full	Microhomology_score_Bae2014	Off_target_score_Hsu2013	Bacterial_colony_number_estimate	BaeI_F_oligo	BaeI_R_oligo	Barcode_F_seq	Target_Enrichment_Forward_Primer	Target_Enrichment_Reverse_Primer	Target_Enrichment_Amplicon_Length	Target_Enrichment_Reference_Sequence
ENSMUSG00000058230	Arhgap35	#1	CG00101	CACTAGAG	-1	chr7	16564517	16564537	AGTGTGATGAGGGCGTTGAG	0.758368	0.675415	0.898843	600000	GAGTGTGATGAGGGCGTTGAGGTTTT	CTCAACGCCCTCATCACACTCGGTGT	AGCTAGTCCGGACACTAGAGGCNNNNNTANNNNNGCNNNNNTANNNNNGCATGCCCAAGAAGAAGAGGAAGGTGTC	GCAGAGGTCTCTACAACCTGG	TGATCAGCTCAAATTTGTCTCCA	165	GCAGAGGTCTCTACAACCTGGAGGTTCTTTTTGCTTAAGGCAAAAGTATGTGCATCTCTAATGTACCGCTCAACGCCCTCATCACACTTAGTCAGGACTACCACTATGGGCTTTTTTGTTTTTGCAAGCTGATTGTAGAGATTGGAGACAAATTTGAGCTGATCA
ENSMUSG00000058230	Arhgap35	#2	CG00102	TGTTACGG	1	chr7	16564450	16564470	CAGAGGTCTCTACAACCTGG	0.737852	0.669716	0.880921	475000	GCAGAGGTCTCTACAACCTGGGTTTT	CCAGGTTGTAGAGACCTCTGCGGTGT	AGCTAGTCCGGATGTTACGGGCNNNNNTANNNNNGCNNNNNTANNNNNGCATGCCCAAGAAGAAGAGGAAGGTGTC	TGAGTTGCACTAAGGTGCTGA	TGACTAAGTGTGATGAGGGCG	144	TGAGTTGCACTAAGGTGCTGAAAGCCAAGTCCACATTCACATTGGACCTTGCAGAGGTCTCTACAACCTGGAGGTTCTTTTTGCTTAAGGCAAAAGTATGTGCATCTCTAATGTACCGCTCAACGCCCTCATCACACTTAGTCA
ENSMUSG00000007880	Arid1a	#1	CG00201	ACAATGGC	-1	chr4	133722904	133722924	ATGGGTCCCAGACTCCACAG	0.839571	0.609945	0.743507	705000	GATGGGTCCCAGACTCCACAGGTTTT	CTGTGGAGTCTGGGACCCATCGGTGT	AGCTAGTCCGGAACAATGGCGCNNNNNTANNNNNGCNNNNNTANNNNNGCATGCCCAAGAAGAAGAGGAAGGTGTC	GCATAAGAGAGGCTGCCCAT	GGGACTAACCCATACTCGCA	155	GCATAAGAGAGGCTGCCCATGGCACTCTGAGCCCGGCCCTGCATGGTCATGGGGTACCGCTGTGGAGTCTGGGACCCATATGGCTGCCCTGGGTACCCATGTCCTTGTTGCGGTCCTGAAGGAGGTCCCTGTTGTTGCGAGTATGGGTTAGTCCC
ENSMUSG00000007880	Arid1a	#2	CG00202	TCGGATCT	1	chr4	133720953	133720973	CCTGCTGGCCATACGCACTG	0.713358	0.625248	0.951439	990000	GCCTGCTGGCCATACGCACTGGTTTT	CAGTGCGTATGGCCAGCAGGCGGTGT	AGCTAGTCCGGATCGGATCTGCNNNNNTANNNNNGCNNNNNTANNNNNGCATGCCCAAGAAGAAGAGGAAGGTGTC	GGTCTGGGATGGTGGTTGC	GGAGGTGAGTCACTTTAAAAGGATG	166	GGTCTGGGATGGTGGTTGCTGGGCGTAAGGTGGCTGCTGCTGGGGATGAGGACTTTGCTGGTTATAGTATGGAGTCTGGCCCTGCTGGCCATACGCACTGGGGCCTTGCTGGCCATAAGGTGGAATCTGTAAGAAAGAAAACATCCTTTTAAAGTGACTCACCTCC
ENSMUSG00000069729	Arid1b	#1	CG00301	TTAGCCTG	1	chr17	5318733	5318753	CTAACGTTCATGGAAGAGAG	0.757171	0.689485	0.899415	1010000	GCTAACGTTCATGGAAGAGAGGTTTT	CTCTCTTCCATGAACGTTAGCGGTGT	AGCTAGTCCGGATTAGCCTGGCNNNNNTANNNNNGCNNNNNTANNNNNGCATGCCCAAGAAGAAGAGGAAGGTGTC	TCCACCACTGGGGAGAAGAT	TGACGCAGACATACAGTCGG	172	TCCACCACTGGGGAGAAGATCACGAAGGTCTATGAGCTGGGGAATGAGCCGGAGAGGAAGCTGTGGGTCGACCGTTACCTAACGTTCATGGAAGAGAGGGGCTCCCCGGTGTCCAGTCTGCCAGCAGTGGGCAAGAAGCCCCTGGACCTGTTCCGACTGTATGTCTGCGTCA
ENSMUSG00000069729	Arid1b	#2	CG00302	AATCCGGT	1	chr17	5040657	5040677	CAGAGCAGCCCATACCCAGG	0.749307	0.71836	0.765624	810000	GCAGAGCAGCCCATACCCAGGGTTTT	CCTGGGTATGGGCTGCTCTGCGGTGT	AGCTAGTCCGGAAATCCGGTGCNNNNNTANNNNNGCNNNNNTANNNNNGCATGCCCAAGAAGAAGAGGAAGGTGTC	AGGGCAGCCCGATGGA	CCTGCATGCCAAGGGGATAC	150	AGGGCAGCCCGATGGACCCAATGGTGATGAAGAGACCTCAGTTGTATGGGATGGGTACTCACCCCCACTCCCAGCCACAGCAGAGCAGCCCATACCCAGGAGGCTCCTACGGTCCCCCAGGTGCACAGCGGTATCCCCTTGGCATGCAGG
ENSMUSG00000033237	Arid2	#1	CG00401	TGACCGAT	1	chr15	96287764	96287784	GGCAGTTCCACCACAGCAGA	0.610567	0.611854	0.756599	940000	GGCAGTTCCACCACAGCAGAGTTTT	TCTGCTGTGGTGGAACTGCCGGTGT	AGCTAGTCCGGATGACCGATGCNNNNNTANNNNNGCNNNNNTANNNNNGCATGCCCAAGAAGAAGAGGAAGGTGTC	TGGCAAAATAATGGCAAACTCG	CGTTCGCCCCGGCTC	150	TGGCAAAATAATGGCAAACTCGACGGGGAAGGCGCCTCCGGACGAGCGGAGGAAGGGACTGGCTTTCCTGGACGAGCTGCGGCAGTTCCACCACAGCAGAGGGTGAGAGCAGGACCGGGGGGGCAGCGCCGGGGCGAGCCGGGGCGAACG
ENSMUSG00000033237	Arid2	#2	CG00402	CAGCTAAC	-1	chr15	96287890	96287910	TCTTCTTAAACGGCGACCTG	0.656692	0.722441	0.956493	795000	GTCTTCTTAAACGGCGACCTGGTTTT	CAGGTCGCCGTTTAAGAAGACGGTGT	AGCTAGTCCGGACAGCTAACGCNNNNNTANNNNNGCNNNNNTANNNNNGCATGCCCAAGAAGAAGAGGAAGGTGTC	GAGCCGGGGCGAACG	TTCGCGAATCCGCCTAAAGT	167	GAGCCGGGGCGAACGGGGGCCCGCCGCGGGCGCGGGGTCCCGGTGACAAGTGCGGGGCTTTCTGTCGCCCGCAGGTCGCCGTTTAAGAAGATCCCTGCGGTGGGTGGGAAGGAGCTGGATCTTCACGGGCTCTACACCAGAGTCACTACTTTAGGCGGATTCGCGAA
ENSMUSG00000030213	Atf7ip	#1	CG00501	TACCAACG	-1	chr6	136561436	136561456	GTCCGGGATCAGCTAACCTG	0.731715	0.645879	0.942042	705000	GTCCGGGATCAGCTAACCTGGTTTT	CAGGTTAGCTGATCCCGGACGGTGT	AGCTAGTCCGGATACCAACGGCNNNNNTANNNNNGCNNNNNTANNNNNGCATGCCCAAGAAGAAGAGGAAGGTGTC	ATGAAGAGGATCTTTCGTGTGG	TGGATCACTAGTCCTGACATCATT	149	ATGAAGAGGATCTTTCGTGTGGAAAAGATGAGTCCGAAGCTGTAGCGCAGAGTAAGATGAGCACCCCAGGTTAGCTGATCCCGGACTTTTACTTGCTTTAATAGACTATTGAGTACAACATGCTCAATGATGTCAGGACTAGTGATCCA
ENSMUSG00000030213	Atf7ip	#2	CG00502	TGCGGTAT	1	chr6	136560906	136560926	GAACAGTAATGTCGTCGAGA	0.635796	0.655401	0.997144	650000	GAACAGTAATGTCGTCGAGAGTTTT	TCTCGACGACATTACTGTTCGGTGT	AGCTAGTCCGGATGCGGTATGCNNNNNTANNNNNGCNNNNNTANNNNNGCATGCCCAAGAAGAAGAGGAAGGTGTC	AGACGACGAACACTTAGACC	ATCCTCCGCTATCTTCGTTGT	160	AGACGACGAACACTTAGACCAAATTCAAAGTAAAGACTCCTGTGATGAGGGAAATAAAGTGAACAGTAATGTCGTCGAGAAGGAAGAACCTCTCGAAACACACAGTGCAATTATTTGTTCTGATCTACCTCCAGAAAACACAACGAAGATAGCGGAGGAT
ENSMUSG00000034218	Atm	#1	CG00601	CCTCAACA	1	chr9	53531685	53531705	CTTCTGTCTGGAGCTCTGTG	0.686002	0.720908	0.604314	660000	GCTTCTGTCTGGAGCTCTGTGGTTTT	CACAGAGCTCCAGACAGAAGCGGTGT	AGCTAGTCCGGACCTCAACAGCNNNNNTANNNNNGCNNNNNTANNNNNGCATGCCCAAGAAGAAGAGGAAGGTGTC	ACACGCAGCCAAGGTTACTTA	CCTTGAAGGTTTTTACAGAAGTACA	176	ACACGCAGCCAAGGTTACTTACTTTTGTTTGCACATTTGATGAAGTATCTGACCAAACTGCTGATCTCTTGCATCTTCTTCTGTCTGGAGCTCTGTGTGGTGGCTGATACATTTGATTTTGCTGTTCTCAGACTTTCCATTTCTTTTTGAATGTACTTCTGTAAAAACCTTCAAGG
ENSMUSG00000034218	Atm	#2	CG00602	TGACGTTC	-1	chr9	53527174	53527194	GTATCTCAGCAACAGTGGCT	0.61793	0.670083	0.792168	915000	GTATCTCAGCAACAGTGGCTGTTTT	AGCCACTGTTGCTGAGATACGGTGT	AGCTAGTCCGGATGACGTTCGCNNNNNTANNNNNGCNNNNNTANNNNNGCATGCCCAAGAAGAAGAGGAAGGTGTC	TCGTCTGTGGGATATAGACTGC	CGTATGGAGCTGACTGTAGCA	172	TCGTCTGTGGGATATAGACTGCTTTTATTGTTGAAATTTCATCTTATAAGGGGGGGAAAAAATCACAGGCTTCAAAACATACCTAGCCACTGTTGCTGAGATACTTCACACCAGTATTTTCTCACAGAAAGAATGTCTTTGAGTAGTATGTTGCTACAGTCAGCTCCATACG
ENSMUSG00000031229	Atrx	#1	CG08601	CTTGCACT	-1	chrX	105888994	105889014	CAGGTTCATCAAGGTCAAAG	0.683822	0.71124	0.80059	235000	GCAGGTTCATCAAGGTCAAAGGTTTT	CTTTGACCTTGATGAACCTGCGGTGT	AGCTAGTCCGGACTTGCACTGCNNNNNTANNNNNGCNNNNNTANNNNNGCATGCCCAAGAAGAAGAGGAAGGTGTC	AGTAAACCAAATAACAAAACAAGAAAACA	GTGTTGGGACAAATTTACTCACCT	161	AGTAAACCAAATAACAAAACAAGAAAACATTTTACTCCTCTCAACATCAACCTACCTCTTTGACCTTGATGAACCTGAAGATCTGGATTTTTCTGAGGTGCTAGCTCCCTAGACAGGAAAAGAAAAATCAAGCAGAAAGGTGAGTAAATTTGTCCCAACAC
ENSMUSG00000031229	Atrx	#2	CG08602	CAATGTCC	-1	chrX	105884295	105884315	AACGCGGAGGTAAATACAAG	0.672732	0.660357	0.947186	710000	GAACGCGGAGGTAAATACAAGGTTTT	CTTGTATTTACCTCCGCGTTCGGTGT	AGCTAGTCCGGACAATGTCCGCNNNNNTANNNNNGCNNNNNTANNNNNGCATGCCCAAGAAGAAGAGGAAGGTGTC	AAAATGGAGGTATTTTTAGTAAGCA	GGGCCTGAATTTAGAAGCAGA	150	AAAATGGAGGTATTTTTAGTAAGCATATGAGATTTTCCAAAATGGTCATAGACAGCAATTTAAACTCATGTTTCATTTCCACTTGTATTTACCTCCGCGTTTTTTGAGATTGTCAGCTTTCATTTTACTTCTGCTTCTAAATTCAGGCCC
ENSMUSG00000021901	Bap1	#1	CG00701	ACAGTCGT	-1	chr14	31252981	31253001	CCAACGTAGAAACCTTGCGG	0.689325	0.693763	0.983443	535000	GCCAACGTAGAAACCTTGCGGGTTTT	CCGCAAGGTTTCTACGTTGGCGGTGT	AGCTAGTCCGGAACAGTCGTGCNNNNNTANNNNNGCNNNNNTANNNNNGCATGCCCAAGAAGAAGAGGAAGGTGTC	TCTGCCTCTTGCTTCTCTAGGC	GCAGACCTGGTGAGCAAAGAAC	159	TCTGCCTCTTGCTTCTCTAGGCCTGTGTATGGATTTATCTTCCTGTTCAAATGGATCGAAGAGCGCAGGTCCCGCCGCAAGGTTTCTACGTTGGTGGATGACACGTCTGTGATTGATGATGATATTGTGAATAACATGTTCTTTGCTCACCAGGTCTGC
ENSMUSG00000021901	Bap1	#2	CG00702	TCTACACC	1	chr14	31251932	31251952	ACCTTCAGAGTAAATGCCAG	0.721638	0.680115	0.776416	810000	GACCTTCAGAGTAAATGCCAGGTTTT	CTGGCATTTACTCTGAAGGTCGGTGT	AGCTAGTCCGGATCTACACCGCNNNNNTANNNNNGCNNNNNTANNNNNGCATGCCCAAGAAGAAGAGGAAGGTGTC	CGACCTCTCCTTTCCTGATCG	CCTCCCTTGAATGGGGTACT	154	CGACCTCTCCTTTCCTGATCGTAGGTGTCAAAGGGGTGCAAGTGGAGGAGATCTATGACCTTCAGAGTAAATGCCAGGGGTGAGTGGCTGGGACGCCCCCTTACCTCCGGAGGGCCGAGAAAGGGCAGGGGAATAGTACCCCATTCAAGGGAGG
ENSMUSG00000041147	Brca2	#1	CG05101	CGCTACTT	-1	chr5	150529669	150529689	CTGAAAGGCGACTGGTCCAG	0.703927	0.735999	0.951284	490000	GCTGAAAGGCGACTGGTCCAGGTTTT	CTGGACCAGTCGCCTTTCAGCGGTGT	AGCTAGTCCGGACGCTACTTGCNNNNNTANNNNNGCNNNNNTANNNNNGCATGCCCAAGAAGAAGAGGAAGGTGTC	CCATCAGTTTGCTTCAACTCCA	AGACCCACCTGTTTCTGCCT	151	CCATCAGTTTGCTTCAACTCCAATAATGTTCAAAGAACGAAGTCAAACTCTACCACTGGACCAGTCGCCTTTCAGAGAATTAGGTAACTAGCTAGGTGTGGTGGCACATGCCTTTAATCCTAGCACTAGAGAGGCAGAAACAGGTGGGTCT
ENSMUSG00000041147	Brca2	#2	CG05102	CGACTAGT	-1	chr5	150536761	150536781	GTACCCAAAGTCTCGTCAAG	0.667499	0.680293	0.972591	265000	GTACCCAAAGTCTCGTCAAGGTTTT	CTTGACGAGACTTTGGGTACGGTGT	AGCTAGTCCGGACGACTAGTGCNNNNNTANNNNNGCNNNNNTANNNNNGCATGCCCAAGAAGAAGAGGAAGGTGTC	AGAACAAGTCAAGCAGCCTGT	TTCCCAATCCACATGCAGAG	157	AGAACAAGTCAAGCAGCCTGTCTTTCTCCGAGTATCAGGAAGTCTATATTCAAGATGAGAGAGCCACTTGACGAGACTTTGGGTACTGTTTTCTCAGATAGTATGACCAACTCAACCTTTACAGAAGAACATGAAGCCTCTGCATGTGGATTGGGAA
ENSMUSG00000044303	Cdkn2a	#1	CG05201	GACCATAG	-1	chr4	89276918	89276938	CGGTGCAGATTCGAACTGCG	0.754365	0.650206	0.997395	265000	GCGGTGCAGATTCGAACTGCGGTTTT	CGCAGTTCGAATCTGCACCGCGGTGT	AGCTAGTCCGGAGACCATAGGCNNNNNTANNNNNGCNNNNNTANNNNNGCATGCCCAAGAAGAAGAGGAAGGTGTC	CCCGTGCAGCACCACC	GATCCCTCTACTTTTTCTTCTGACT	178	CCCGTGCAGCACCACCAGCGTGTCCAGGAAGCCTTCCCGCGCTGCGTCGTGCACCGGGCGGGAGAAGGTAGTGGGGTCCTCGCAGTTCGAATCTGCACCGTAGTTGAGCAGAAGAGCTGCTACGTGAACGTTGCCCATCATCATCACCTGAAAAGTCAGAAGAAAAAGTAGAGGGATC
ENSMUSG00000044303	Cdkn2a	#2	CG05202	CACTGCTA	-1	chr4	89276938	89276958	GCAGCTCTTCTGCTCAACTA	0.650645	0.733388	0.892654	1135000	GCAGCTCTTCTGCTCAACTAGTTTT	TAGTTGAGCAGAAGAGCTGCGGTGT	AGCTAGTCCGGACACTGCTAGCNNNNNTANNNNNGCNNNNNTANNNNNGCATGCCCAAGAAGAAGAGGAAGGTGTC	CCCGTGCAGCACCACC	GATCCCTCTACTTTTTCTTCTGACT	178	CCCGTGCAGCACCACCAGCGTGTCCAGGAAGCCTTCCCGCGCTGCGTCGTGCACCGGGCGGGAGAAGGTAGTGGGGTCCTCGCAGTTCGAATCTGCACCGTAGTTGAGCAGAAGAGCTGCTACGTGAACGTTGCCCATCATCATCACCTGAAAAGTCAGAAGAAAAAGTAGAGGGATC
ENSMUSG00000028551	Cdkn2c	#1	CG00901	CTGAACCT	-1	chr4	109665131	109665151	AAAGAATGGCCGAGCCTTGG	0.690932	0.663895	0.889403	655000	GAAAGAATGGCCGAGCCTTGGGTTTT	CCAAGGCTCGGCCATTCTTTCGGTGT	AGCTAGTCCGGACTGAACCTGCNNNNNTANNNNNGCNNNNNTANNNNNGCATGCCCAAGAAGAAGAGGAAGGTGTC	AACTAGTAAGTTGCTCTAGGTCCC	TGCAGCCTGATTAGGAGCAAA	150	AACTAGTAAGTTGCTCTAGGTCCCCCCTGGCAGCTGCGGACGCCAACTCGTTCCCCCAAGGCTCGGCCATTCTTTAGGGTCCTGACGATCGGGAAAAGACGATTAGTTGCTTCTCTTTTTCCCCTTTCCTTTGCTCCTAATCAGGCTGCA
ENSMUSG00000028551	Cdkn2c	#2	CG00903	TGAGTGTC	-1	chr4	109665101	109665121	TGGCGTCCGCAGCTGCCAGG	0.610306	0.720248	0.834153	176000	GTGGCGTCCGCAGCTGCCAGGGTTTT	CCTGGCAGCTGCGGACGCCACGGTGT	AGCTAGTCCGGATGAGTGTCGCNNNNNTANNNNNGCNNNNNTANNNNNGCATGCCCAAGAAGAAGAGGAAGGTGTC	CAGCGCAGTTCTCCCAAATC	TTTTCCCGATCGTCAGGACC	153	CAGCGCAGTTCTCCCAAATCCATTTTGAGCGTTGACGTTTACATTATTTTGCAACAAACTAGTAAGTTGCTCTAGGTCCCCCCTGGCAGCTGCGGACGCCAACTCGTTCCCCCAAGGCTCGGCCATTCTTTAGGGTCCTGACGATCGGGAAAA
ENSMUSG00000005442	Cic	#1	CG01001	GAACCAGA	-1	chr7	25282895	25282915	GAACATGCCGAGGCCACGAG	0.709439	0.719574	0.906134	725000	GAACATGCCGAGGCCACGAGGTTTT	CTCGTGGCCTCGGCATGTTCGGTGT	AGCTAGTCCGGAGAACCAGAGCNNNNNTANNNNNGCNNNNNTANNNNNGCATGCCCAAGAAGAAGAGGAAGGTGTC	GCTCCGGACCATGTACTCG	CCCATCACTGATACTCGGCG	150	GCTCCGGACCATGTACTCGGCCCACAGGCCCCTGATACCCGCGTCTGGCGCGGCCTCTCGTGGCCTCGGCATGTTCGGTCAGTAGCGTCTGGCGCTGGGACTGCAGGGGTCAATGTGTCGGGGTGCTAAGCGCCGAGTATCAGTGATGGG
ENSMUSG00000005442	Cic	#2	CG01002	GAGATCCA	-1	chr7	25282905	25282925	GCTACTGACCGAACATGCCG	0.689381	0.640571	0.976649	1125000	GCTACTGACCGAACATGCCGGTTTT	CGGCATGTTCGGTCAGTAGCGGTGT	AGCTAGTCCGGAGAGATCCAGCNNNNNTANNNNNGCNNNNNTANNNNNGCATGCCCAAGAAGAAGAGGAAGGTGTC	GCTCCGGACCATGTACTCG	CCCATCACTGATACTCGGCG	150	GCTCCGGACCATGTACTCGGCCCACAGGCCCCTGATACCCGCGTCTGGCGCGGCCTCTCGTGGCCTCGGCATGTTCGGTCAGTAGCGTCTGGCGCTGGGACTGCAGGGGTCAATGTGTCGGGGTGCTAAGCGCCGAGTATCAGTGATGGG
ENSMUSG00000046441	Cmtr2	#1	CG05301	ACTGCATG	-1	chr8	110221207	110221227	CCCACAGGAGAAGCTCTCCG	0.691567	0.752312	0.885096	360000	GCCCACAGGAGAAGCTCTCCGGTTTT	CGGAGAGCTTCTCCTGTGGGCGGTGT	AGCTAGTCCGGAACTGCATGGCNNNNNTANNNNNGCNNNNNTANNNNNGCATGCCCAAGAAGAAGAGGAAGGTGTC	GACGTGTCTGAGCTCTTTGC	CGCTCAGGAGGTTCTTCACTT	163	GACGTGTCTGAGCTCTTTGCCAAGAGCTTTTCCTACCGTAAGCCACTCGATAATGAGTGGCAGTTACCAGCTCCCACGGAGAGCTTCTCCTGTGGGCACCTCGAGTTCAGGGCTCTTCTAGACTTGAAGAACTCCCTGAACGAAGTGAAGAACCTCCTGAGCG
ENSMUSG00000046441	Cmtr2	#2	CG05302	CTAGTGAC	1	chr8	110221168	110221188	GTAAGCCACTCGATAATGAG	0.707793	0.616004	0.947745	1260000	GTAAGCCACTCGATAATGAGGTTTT	CTCATTATCGAGTGGCTTACGGTGT	AGCTAGTCCGGACTAGTGACGCNNNNNTANNNNNGCNNNNNTANNNNNGCATGCCCAAGAAGAAGAGGAAGGTGTC	CTTGGAGACCTTCAGCCCAG	GTCTAGAAGAGCCCTGAACTCG	154	CTTGGAGACCTTCAGCCCAGACGTCCTCAATGACGTGTCTGAGCTCTTTGCCAAGAGCTTTTCCTACCGTAAGCCACTCGATAATGAGTGGCAGTTACCAGCTCCCACGGAGAGCTTCTCCTGTGGGCACCTCGAGTTCAGGGCTCTTCTAGAC
ENSMUSG00000020661	Dnmt3a	#1	CG01201	ACCGATTC	1	chr12	3896978	3896998	ATGATTGAATGGGCCCTCGG	0.675298	0.73151	0.917724	700000	GATGATTGAATGGGCCCTCGGGTTTT	CCGAGGGCCCATTCAATCATCGGTGT	AGCTAGTCCGGAACCGATTCGCNNNNNTANNNNNGCNNNNNTANNNNNGCATGCCCAAGAAGAAGAGGAAGGTGTC	TTTCCAGCTTGCCATGACAGT	CTGCACTGGACCAGACCACA	155	TTTCCAGCTTGCCATGACAGTGATGAAAGTGACAGTGGCAAGGCTGTGGAAGTGCAGAACAAGCAGATGATTGAATGGGCCCTCGGTGGCTTCCAGCCCTCGGGTCCTAAGGGCCTGGAGCCACCAGAAGGTAAATGTGGTCTGGTCCAGTGCAG
ENSMUSG00000020661	Dnmt3a	#2	CG01202	TCTGCCTT	1	chr12	3896053	3896073	CAGGCCGAATTGTGTCTTGG	0.670739	0.601226	0.91465	230000	GCAGGCCGAATTGTGTCTTGGGTTTT	CCAAGACACAATTCGGCCTGCGGTGT	AGCTAGTCCGGATCTGCCTTGCNNNNNTANNNNNGCNNNNNTANNNNNGCATGCCCAAGAAGAAGAGGAAGGTGTC	TCTTTGGGGCTCCAGGATGG	TCTCCGAACCACATGACCCA	158	TCTTTGGGGCTCCAGGATGGCCGGGGCTTTGGCATTGGAGAGCTGGTGTGGGGGAAACTTCGGGGCTTCTCCTGGTGGCCAGGCCGAATTGTGTCTTGGTGGATGACAGGCCGGAGCCGAGCAGCTGAAGGCACTCGCTGGGTCATGTGGTTCGGAGA
ENSMUSG00000061589	Dot1l	#1	CG01301	CAGTGCAT	1	chr10	80777589	80777609	GGGAACGGATCGCCAACACG	0.742011	0.648707	0.992347	530000	GGGAACGGATCGCCAACACGGTTTT	CGTGTTGGCGATCCGTTCCCGGTGT	AGCTAGTCCGGACAGTGCATGCNNNNNTANNNNNGCNNNNNTANNNNNGCATGCCCAAGAAGAAGAGGAAGGTGTC	CCAAGCAAGCCTGTGAGTAAAC	CTGGAGAGCAAGTCAGAGGTC	156	CCAAGCAAGCCTGTGAGTAAACATGTTCCTTTCTTCCTTAGCTGGAACGAGGTGACTTCCTCTCAGAGGAATGGAGGGAACGGATCGCCAACACGAGGTACGGCCGGCTGTGGGCTGTGCTGCTGGCTGTGCTGGGACCTCTGACTTGCTCTCCAG
ENSMUSG00000061589	Dot1l	#2	CG01302	GTAGACGA	-1	chr10	80771134	80771154	TGTGTAGTGCCCTTCCACTG	0.733922	0.637576	0.909973	945000	GTGTGTAGTGCCCTTCCACTGGTTTT	CAGTGGAAGGGCACTACACACGGTGT	AGCTAGTCCGGAGTAGACGAGCNNNNNTANNNNNGCNNNNNTANNNNNGCATGCCCAAGAAGAAGAGGAAGGTGTC	AGCCTCCCCAGTTTTGGATG	AGGATGTGCCGCAGAAGTC	150	AGCCTCCCCAGTTTTGGATGCCAGACAGGTGTGCTGTTAGCTGCTGTTGAGTATAATGGGTTATGTCTACTCTTGTCCCCAGTGGAAGGGCACTACACAGCCCATGAAGCTGAATACTCGGCCGTCCAATGGACTTCTGCGGCACATCCT
ENSMUSG00000055024	Ep300	#1	CG01401	CGCATTCT	-1	chr15	81613269	81613289	AAGCTCGCTCTATAGAGCTG	0.726144	0.701051	0.925975	510000	GAAGCTCGCTCTATAGAGCTGGTTTT	CAGCTCTATAGAGCGAGCTTCGGTGT	AGCTAGTCCGGACGCATTCTGCNNNNNTANNNNNGCNNNNNTANNNNNGCATGCCCAAGAAGAAGAGGAAGGTGTC	TAGCTCTCTAGGAGTGGGGC	TTCTTTGCTTGTACCTGGGGT	150	TAGCTCTCTAGGAGTGGGGCAGCAGTCCACTCCTAGCCTAAGCACTGTTAGTCAGATTGACCCCAGCTCTATAGAGCGAGCTTACGCTGCTCTTGGACTACCCTATCAAGTAAACCAGATTCCACCACAACCCCAGGTACAAGCAAAGAA
ENSMUSG00000055024	Ep300	#2	CG01402	ATACCGAG	-1	chr15	81613387	81613407	TTCACAGACCGCATGCCCTG	0.7265	0.728871	0.891408	750000	GTTCACAGACCGCATGCCCTGGTTTT	CAGGGCATGCGGTCTGTGAACGGTGT	AGCTAGTCCGGAATACCGAGGCNNNNNTANNNNNGCNNNNNTANNNNNGCATGCCCAAGAAGAAGAGGAAGGTGTC	ACCCTATCAAGTAAACCAGATTCCA	CACATTTAACCAGTATCACGTCTGG	153	ACCCTATCAAGTAAACCAGATTCCACCACAACCCCAGGTACAAGCAAAGAATCAACAAAGCCAGCCATCTGGACAGTCTCCCCAGGGCATGCGGTCTGTGAACAACATGAGTAAGTGTGTCTTCCAGTCCAGACGTGATACTGGTTAAATGTG
ENSMUSG00000022545	Ercc4	#1	CG01501	CTCTATGC	1	chr16	13111814	13111834	TATGAAGTCTACACGCAGGG	0.757773	0.692766	0.980247	100000	GTATGAAGTCTACACGCAGGGGTTTT	CCCTGCGTGTAGACTTCATACGGTGT	AGCTAGTCCGGACTCTATGCGCNNNNNTANNNNNGCNNNNNTANNNNNGCATGCCCAAGAAGAAGAGGAAGGTGTC	TCAATCAGTTGAAGATAGAAGGAGT	TTCTACCTGTCAAGAAATCAACCAC	150	TCAATCAGTTGAAGATAGAAGGAGTTGAACATCTCCCTCGACGAGTGACAAATGAAATCGCAAGTAACAGTCGCTATGAAGTCTACACGCAGGGTGGTATTATATTTGCAACAAGCCGAATACTCGTGGTTGATTTCTTGACAGGTAGAA
ENSMUSG00000022545	Ercc4	#2	CG01502	TGTATCGC	-1	chr16	13125258	13125278	ACAAAGGGTCCAAGTAATGG	0.720395	0.707699	0.880314	845000	GACAAAGGGTCCAAGTAATGGGTTTT	CCATTACTTGGACCCTTTGTCGGTGT	AGCTAGTCCGGATGTATCGCGCNNNNNTANNNNNGCNNNNNTANNNNNGCATGCCCAAGAAGAAGAGGAAGGTGTC	TGGAAAGTATGGCTGTGTAAAGA	ATCTTTAAATCCTGCACCAAGGA	150	TGGAAAGTATGGCTGTGTAAAGAAAAGCCATATTGAGAATATCCTAACAACAGTAAATTGTATTCTTTTTCAGACAATCCGCCATTACTTGGACCCTTTGTGGCATCAGCTTGGAGCCAAGACTAAATCCTTGGTGCAGGATTTAAAGAT
ENSMUSG00000070047	Fat1	#1	CG05501	GTGTGTTG	-1	chr8	44951859	44951879	CGAGGACTTCGACTTCCCGG	0.763715	0.770733	0.996817	1585000	GCGAGGACTTCGACTTCCCGGGTTTT	CCGGGAAGTCGAAGTCCTCGCGGTGT	AGCTAGTCCGGAGTGTGTTGGCNNNNNTANNNNNGCNNNNNTANNNNNGCATGCCCAAGAAGAAGAGGAAGGTGTC	GAACTGATGCCTCGCGTGTA	GGAATGGTCCCCTCACAGTT	155	GAACTGATGCCTCGCGTGTACACGCTGAGGATCCGTGCGTCTGACTGGGGCTTGCCATACCGCCGGGAAGTCGAAGTCCTCGCCACGATTACTCTCAATAACCTGAATGACAACACACCCCTGTTTGAGAGGATAAACTGTGAGGGGACCATTCC
ENSMUSG00000070047	Fat1	#2	CG05502	ATAACGCC	1	chr8	45007241	45007261	GTCTCATCACAACCACGTCG	0.725153	0.803439	0.970034	160000	GTCTCATCACAACCACGTCGGTTTT	CGACGTGGTTGTGATGAGACGGTGT	AGCTAGTCCGGAATAACGCCGCNNNNNTANNNNNGCNNNNNTANNNNNGCATGCCCAAGAAGAAGAGGAAGGTGTC	TGCGGCTTCTGAGTAAACTAGTCC	AAGGCTTACTTCTAGAATGTGCTCG	150	TGCGGCTTCTGAGTAAACTAGTCCGGTGTGGGGGTGGATGGTATTTCGCTCTGATCAATAAGTGTCCACCCTTTTCCAGGTCTCATCACAACCACGTCGAGGAAGCTGGACCGAGAACAGCAGGACGAGCACATTCTAGAAGTAAGCCTT
ENSMUSG00000028086	Fbxw7	#1	CG05601	GTCCATTC	1	chr3	84972383	84972403	ACGTTAGTGGGACATACAGG	0.73831	0.648288	0.876069	660000	GACGTTAGTGGGACATACAGGGTTTT	CCTGTATGTCCCACTAACGTCGGTGT	AGCTAGTCCGGAGTCCATTCGCNNNNNTANNNNNGCNNNNNTANNNNNGCATGCCCAAGAAGAAGAGGAAGGTGTC	TGGGATGTTAGTGTAGTCTTTGA	CCACACTTTGAGAGTCCGGT	173	TGGGATGTTAGTGTAGTCTTTGACTTACTTGCATTTCTACCTAAAATTAATCATCTGAAGTGTTTTTCCAGTGTCTGAGAACGTTAGTGGGACATACAGGTGGAGTGTGGTCATCACAGATGAGAGACAATATCATCATCAGTGGATCGACTGACCGGACTCTCAAAGTGTGG
ENSMUSG00000028086	Fbxw7	#2	CG05602	GTTATGGC	-1	chr3	84958508	84958528	TGAACATGGTACAAGGCCAG	0.742065	0.697657	0.817713	150000	GTGAACATGGTACAAGGCCAGGTTTT	CTGGCCTTGTACCATGTTCACGGTGT	AGCTAGTCCGGAGTTATGGCGCNNNNNTANNNNNGCNNNNNTANNNNNGCATGCCCAAGAAGAAGAGGAAGGTGTC	ACGTATAAGCAGGAAATCCAA	GACAGATGTAATCCTCCGCC	188	ACGTATAAGCAGGAAATCCAAAATTTTTAACTCTGAAATATTGGTAACATTAATACTTTCATACTTTTTATTTTATTTTATTTTTTAGTACCACTGGCCTTGTACCATGTTCAGCAACACCAACAACTTTTGGGGACCTGAGAGCAGCCAATGGGCAAGGGCAGCAGCGGCGGAGGATTACATCTGTC
ENSMUSG00000015619	Gata3	#1	CG02001	CTAGGAGT	-1	chr2	9877387	9877407	CTACTACGGAAACTCCGTCA	0.682208	0.785327	0.980095	210000	GCTACTACGGAAACTCCGTCAGTTTT	TGACGGAGTTTCCGTAGTAGCGGTGT	AGCTAGTCCGGACTAGGAGTGCNNNNNTANNNNNGCNNNNNTANNNNNGCATGCCCAAGAAGAAGAGGAAGGTGTC	CCAAAAGGTTCCAGCGCCAA	ATCCGCTGACGGAAGAGGTG	151	CCAAAAGGTTCCAGCGCCAAGGTGGACTCACCGTGGTGGGTCGGAGGATACCTCTGCACCGTAGCCCTGACGGAGTTTCCGTAGTAGGACGGGACGTGGTTGCCTTGACCATCGATGTTAAAAAGTACGTCCACCTCTTCCGTCAGCGGAT
ENSMUSG00000015619	Gata3	#2	CG02002	ATTCCTCC	-1	chr2	9877353	9877373	AGGTATCCTCCGACCCACCA	0.732311	0.700084	0.940928	120000	GAGGTATCCTCCGACCCACCAGTTTT	TGGTGGGTCGGAGGATACCTCGGTGT	AGCTAGTCCGGAATTCCTCCGCNNNNNTANNNNNGCNNNNNTANNNNNGCATGCCCAAGAAGAAGAGGAAGGTGTC	CCAAAAGGTTCCAGCGCCAA	ATCCGCTGACGGAAGAGGTG	151	CCAAAAGGTTCCAGCGCCAAGGTGGACTCACCGTGGTGGGTCGGAGGATACCTCTGCACCGTAGCCCTGACGGAGTTTCCGTAGTAGGACGGGACGTGGTTGCCTTGACCATCGATGTTAAAAAGTACGTCCACCTCTTCCGTCAGCGGAT
ENSMUSG00000037369	Kdm6a	#1	CG05701	GCAGCTAT	-1	chrX	18246384	18246404	AATTCGTGCTGCAAGTCCAG	0.744562	0.724242	0.91917	475000	GAATTCGTGCTGCAAGTCCAGGTTTT	CTGGACTTGCAGCACGAATTCGGTGT	AGCTAGTCCGGAGCAGCTATGCNNNNNTANNNNNGCNNNNNTANNNNNGCATGCCCAAGAAGAAGAGGAAGGTGTC	GCAACCAACCTCAGGATGCTATTA	GCCTGGGTGTTCTAGGGAAAT	160	GCAACCAACCTCAGGATGCTATTAAATGCTATTTAAATGCAACTAGAAGCAAAAATTGTAGTAATACCTCTGGACTTGCAGCACGAATTAAGTATTTACAGGTAAAAATTTTAAATACCAATTTTTTTAAAAGCCACATATTTCCCTAGAACACCCAGGC
ENSMUSG00000037369	Kdm6a	#2	CG05702	GCTATACG	1	chrX	18241699	18241719	AGGTTGGATGCATCACACTG	0.782434	0.694194	0.786592	730000	GAGGTTGGATGCATCACACTGGTTTT	CAGTGTGATGCATCCAACCTCGGTGT	AGCTAGTCCGGAGCTATACGGCNNNNNTANNNNNGCNNNNNTANNNNNGCATGCCCAAGAAGAAGAGGAAGGTGTC	GGTTATTTTTATTAAATTTTTGCTTTGTG	GGCCAGAATTTGGATCTGCT	180	GGTTATTTTTATTAAATTTTTGCTTTGTGTTCTTAAAAATAGAATTCTTATATAATGTTTATTAATGTTTTAAAGGTTGGATGCATCACACTGTGGATCTCCTGGGAGATAAGGCCACCAAGGAAAGTTATGCTATTCAGTATCTCCAGAAGTCCTTGGAAGCAGATCCAAATTCTGGCC
ENSMUSG00000003308	Keap1	#1	CG05801	GAGAGGTA	-1	chr9	21233935	21233955	TCAAATACGACTGCCCGCAG	0.667275	0.719686	0.986986	810000	GTCAAATACGACTGCCCGCAGGTTTT	CTGCGGGCAGTCGTATTTGACGGTGT	AGCTAGTCCGGAGAGAGGTAGCNNNNNTANNNNNGCNNNNNTANNNNNGCATGCCCAAGAAGAAGAGGAAGGTGTC	GCCTGCAGGATCTCACACTTC	GAACGTACGCTGCGAGTCC	168	GCCTGCAGGATCTCACACTTCTGCAGCTGCGTCTGCAGGAAGCGCGGCGTGAGCGCATGGCAGCGCACGGCCCGCAGCAGTGCCTGCACGTAGAAGCGCCGCTGCGGGCAGTCGTATTTGACCCAGTCGATGCACGCGTGGAACACCTCGGACTCGCAGCGTACGTTC
ENSMUSG00000003308	Keap1	#2	CG05802	TTCCGAAG	1	chr9	21237556	21237576	GGTTCGGTTACCGTCCTGCG	0.669453	0.695665	1	590000	GGTTCGGTTACCGTCCTGCGGTTTT	CGCAGGACGGTAACCGAACCGGTGT	AGCTAGTCCGGATTCCGAAGGCNNNNNTANNNNNGCNNNNNTANNNNNGCATGCCCAAGAAGAAGAGGAAGGTGTC	TCGTTCATGACGCCAAAAGC	CCTGTGGTCAAAGTGCCCC	153	TCGTTCATGACGCCAAAAGCCTGCTTGGTGTGATCCTCTAGTGTGTAGCTGAAGGTTCGGTTACCGTCCTGCGAGGGCGTCACCTCTGCCTTGCACTCCGTGGAGGCATACATCACTGCGTCCCCGGCCCCCTCGGGGCACTTTGACCACAGG
ENSMUSG00000038056	Kmt2c	#1	CG08701	CAAGCTCA	1	chr5	25414895	25414915	TTCTACGCCAACAGAGACCA	0.695014	0.665912	0.775107	4740000	GTTCTACGCCAACAGAGACCAGTTTT	TGGTCTCTGTTGGCGTAGAACGGTGT	AGCTAGTCCGGACAAGCTCAGCNNNNNTANNNNNGCNNNNNTANNNNNGCATGCCCAAGAAGAAGAGGAAGGTGTC	TCTCCAGTCAGTATACCACCCTT	AGTGGATAGCAGCAAACAGC	154	TCTCCAGTCAGTATACCACCCTTTCCCCTGTCGGTGTCTCTAGTCCAGTTCTAACCTGATTTTGGCTTCTACGCCAACAGAGACCAGGGAGTTTGCAGATTCCTCAGACACAGACCGCTGAAGAGCTGAGACTGGCTGTTTGCTGCTATCCACT
ENSMUSG00000038056	Kmt2c	#2	CG08702	GTTGCAAG	-1	chr5	25405457	25405477	AAGCACCCAGACAGCCTGTG	0.700236	0.71939	0.707237	750000	GAAGCACCCAGACAGCCTGTGGTTTT	CACAGGCTGTCTGGGTGCTTCGGTGT	AGCTAGTCCGGAGTTGCAAGGCNNNNNTANNNNNGCNNNNNTANNNNNGCATGCCCAAGAAGAAGAGGAAGGTGTC	CAAATAAGGCTTGGACATCAATGG	TTGTTTTTAGAGAACGACCTCCC	150	CAAATAAGGCTTGGACATCAATGGCATCTGGAAGGCCAACCAGACTGAGTTCATCCCATAACTTGCCCGCCTGGTCCTCACAGGCTGTCTGGGTGCTTACACTTACACAAGAAACGGCACTCTGCTGGGGAGGTCGTTCTCTAAAAACAA
ENSMUSG00000048154	Kmt2d	#1	CG02201	GCGACATT	-1	chr15	98866181	98866201	TTGTGCTCTCTGTAACTGCG	0.704234	0.711391	0.900578	135000	GTTGTGCTCTCTGTAACTGCGGTTTT	CGCAGTTACAGAGAGCACAACGGTGT	AGCTAGTCCGGAGCGACATTGCNNNNNTANNNNNGCNNNNNTANNNNNGCATGCCCAAGAAGAAGAGGAAGGTGTC	GCCAGTCAGATGGCAACTCAA	AGATCACAGGGTCCTGGGGG	156	GCCAGTCAGATGGCAACTCAAAGCGCTGCAGCTCCCTCTGCCCATGCAGACCGGGCTCCCCGCAGTTACAGAGAGCACAACGCCGTGCTGGACCCCTACTGTAGACACACAGACATCAGCACCATGGCAGCCAGCACCCCCAGGACCCTGTGATCT
ENSMUSG00000048154	Kmt2d	#2	CG02202	CTCAGGTA	1	chr15	98864441	98864461	GAGCATCCGGCGCATCAATG	0.687277	0.625922	0.996226	80000	GAGCATCCGGCGCATCAATGGTTTT	CATTGATGCGCCGGATGCTCGGTGT	AGCTAGTCCGGACTCAGGTAGCNNNNNTANNNNNGCNNNNNTANNNNNGCATGCCCAAGAAGAAGAGGAAGGTGTC	TTCCTTGGGTTGCATAGAGGTC	GGAGTTGTTAGCTGGAGAGAGC	165	TTCCTTGGGTTGCATAGAGGTCACATGCCCACCCTTTGGCTGCCCTTGGCATGCAACGTACAGAGCATCCGGCGCATCAATGGGGATCTCACCAGGCTCTGGGGGGGACAATCTGCAGAGGGCACAGGGGAGCAGGCACTGTGGCTCTCTCCAGCTAACAACTCC
ENSMUSG00000040021	Lats1	#1	CG02301	AGGCGAAT	1	chr10	7691560	7691580	AGGAGATCCGAGAATCCCTG	0.78263	0.700925	0.794308	355000	GAGGAGATCCGAGAATCCCTGGTTTT	CAGGGATTCTCGGATCTCCTCGGTGT	AGCTAGTCCGGAAGGCGAATGCNNNNNTANNNNNGCNNNNNTANNNNNGCATGCCCAAGAAGAAGAGGAAGGTGTC	AAAAGCCAGAAGGGTACAGACA	TCAGGTTATGCTCGGCCTTC	150	AAAAGCCAGAAGGGTACAGACAGATGAGGCCTAAGACCTTTCCTGCCAGCAACTACCCTGGCAGCAGCCGACAGATGCTGCAGGAGATCCGAGAATCCCTGAGGAATTTATCAAAACCATCTGATGCTTCGAAGGCCGAGCATAACCTGA
ENSMUSG00000040021	Lats1	#2	CG02302	AGCCATGA	-1	chr10	7697591	7697611	GCAGACATCTGCTCTCGACG	0.688672	0.635403	0.969733	135000	GCAGACATCTGCTCTCGACGGTTTT	CGTCGAGAGCAGATGTCTGCGGTGT	AGCTAGTCCGGAAGCCATGAGCNNNNNTANNNNNGCNNNNNTANNNNNGCATGCCCAAGAAGAAGAGGAAGGTGTC	AACAGAAGCATAGAAGCCGC	CAGGTATTTTGAAGAGAGGAGGA	155	AACAGAAGCATAGAAGCCGCTGTTGAATTCATTAGTAAAATGAGTTACCAAGACCCTCGTCGAGAGCAGATGTCTGCAGCAGCTGCCAGGCCTATTAATGCCACCATGAAACCAGGTGATTCATCATCTTTTTCCTCCTCTCTTCAAAATACCTG
ENSMUSG00000049252	Lrp1b	#1	CG05901	TTCCTGGA	-1	chr2	41282219	41282239	AAGACGTTCTGAGATCCGAG	0.820344	0.741775	0.993005	525000	GAAGACGTTCTGAGATCCGAGGTTTT	CTCGGATCTCAGAACGTCTTCGGTGT	AGCTAGTCCGGATTCCTGGAGCNNNNNTANNNNNGCNNNNNTANNNNNGCATGCCCAAGAAGAAGAGGAAGGTGTC	CGAAGTCTATTACAGCAACATCG	TGATCACTTTAATTCCTTTTTCCAG	154	CGAAGTCTATTACAGCAACATCGTCAATATCTGGGACAGTGAAGGCTGTGATGAAGTTCACATAGGGATTGTCAATGTCCACCCCTCGGATCTCAGAACGTCTTGCATAAAGAAGAAATTTTTTCATTTCTGGAAAAAGGAATTAAAGTGATCA
ENSMUSG00000049252	Lrp1b	#2	CG05902	CAACAAGC	1	chr2	42323653	42323673	TCTGGGAGACACAAGTCACA	0.667968	0.666428	0.678268	955000	GTCTGGGAGACACAAGTCACAGTTTT	TGTGACTTGTGTCTCCCAGACGGTGT	AGCTAGTCCGGACAACAAGCGCNNNNNTANNNNNGCNNNNNTANNNNNGCATGCCCAAGAAGAAGAGGAAGGTGTC	ATGGAGGCAAATCCAAAGGCAAA	TTCAGATCAGCATTTGTGTGACCCT	167	ATGGAGGCAAATCCAAAGGCAAAGAGCTTTTCTACTCACAGGTATCTAAAGACTCATCTGACTGGTCAGGGCAGTCAGGGTCTCCATCGCACAGCCAACTCTGGGAGACACAAGTCACATGGTCGTGGCAAAGAAATTCGCCAGGGTCACACAAATGCTGATCTGAA
ENSMUSG00000033943	Mga	#1	CG02401	CGTTGAAC	-1	chr2	119903059	119903079	TTATACCGATGACTATCCAC	0.661527	0.791564	0.961558	995000	GTTATACCGATGACTATCCACGTTTT	GTGGATAGTCATCGGTATAACGGTGT	AGCTAGTCCGGACGTTGAACGCNNNNNTANNNNNGCNNNNNTANNNNNGCATGCCCAAGAAGAAGAGGAAGGTGTC	ACGCATGTTTCCTTATTGTCGAT	CCCAAAATATGGGGTTCAGCC	156	ACGCATGTTTCCTTATTGTCGATATTGGATAACAGGCTTAGATTCAAATTTAAAGTATATCCTTGTAATGGACATATCTCCTGTGGATAGTCATCGGTATAAGTGGAATGGTCGTTGGTGGGAACCCAGTGGGAAGGCTGAACCCCATATTTTGGG
ENSMUSG00000033943	Mga	#2	CG02402	GCATTGAG	-1	chr2	119902869	119902889	CCACAGTACAATCAGCCGGA	0.667912	0.750191	0.981792	165000	GCCACAGTACAATCAGCCGGAGTTTT	TCCGGCTGATTGTACTGTGGCGGTGT	AGCTAGTCCGGAGCATTGAGGCNNNNNTANNNNNGCNNNNNTANNNNNGCATGCCCAAGAAGAAGAGGAAGGTGTC	CTAATCGAGATGCCCGTGCT	TGGTCAGAATCATCTCTGTGCT	168	CTAATCGAGATGCCCGTGCTTTGTTGAGTAGGGAGTCATCACCAGGAAAATCTAAAGAGAAAATTTGCCTTCCGGCTGATTGTACTGTGGGAAAAATCACGGTTACCCTTGATAACAATAGTATGTGGAATGAGTTCCATAATCGAAGCACAGAGATGATTCTGACCA
ENSMUSG00000038369	Ncoa6	#1	CG02501	CTGGCATA	-1	chr2	155437861	155437881	GTGCCCAACTTGTTACACAT	0.716574	0.70424	0.913762	390000	GTGCCCAACTTGTTACACATGTTTT	ATGTGTAACAAGTTGGGCACGGTGT	AGCTAGTCCGGACTGGCATAGCNNNNNTANNNNNGCNNNNNTANNNNNGCATGCCCAAGAAGAAGAGGAAGGTGTC	CTAGCATCATGGTTGTAGGCA	AGCCTTCAAAGGAAATATAGATGA	151	CTAGCATCATGGTTGTAGGCAAGTAAGCATGTCAAAGCAACAAGAAGAAAGCAAAGATTAATTACCCATGTGTAACAAGTTGGGCACATTCTTTAATATTGCATCCAGTTTCCATTTGAAGTCTTTATCATCTATATTTCCTTTGAAGGCT
ENSMUSG00000038369	Ncoa6	#2	CG02501	ACACTCAC	1	chr2	155422878	155422898	GATGACATGTTCCCGCCCTG	0.728519	0.663221	0.928062	100000	GATGACATGTTCCCGCCCTGGTTTT	CAGGGCGGGAACATGTCATCGGTGT	AGCTAGTCCGGAACACTCACGCNNNNNTANNNNNGCNNNNNTANNNNNGCATGCCCAAGAAGAAGAGGAAGGTGTC	ACACTACCTGACTGAGAAGC	TGGTTTCCTTCTTCTAGGTCTAAT	153	ACACTACCTGACTGAGAAGCAGGGCGAGGAGTCCTGGGTTGCAGTTCTGGATTGGGGCCTGGTGCCATCATGGAAGATGACATGTTCCCGCCCTGGGGCGTCATAACAGCGGCAGGGCTCGTCATCCTTATTAGACCTAGAAGAAGGAAACCA
ENSMUSG00000018501	Ncor1	#1	CG02601	CTCTTCAC	-1	chr11	62423014	62423034	TCACTCAGGACCCTCACCGG	0.691879	0.675253	0.894905	930000	GTCACTCAGGACCCTCACCGGGTTTT	CCGGTGAGGGTCCTGAGTGACGGTGT	AGCTAGTCCGGACTCTTCACGCNNNNNTANNNNNGCNNNNNTANNNNNGCATGCCCAAGAAGAAGAGGAAGGTGTC	ACTAACACGCTGGAAATGGG	AGATGGTTTTTGCTTTGTTTTTATT	174	ACTAACACGCTGGAAATGGGCATCAGAAACTGGCTCCAGGCGTGGGCGCTTGGACTCCAAGGAATCATGATCCACCGGTGAGGGTCCTGAGTGAAACTGTTCATATCCAGTTCTCCTTTCTTGAGGCCTAATACATTCCAAAAAATAAAAATAAAAACAAAGCAAAAACCATCT
ENSMUSG00000018501	Ncor1	#2	CG02602	CAGACAGT	-1	chr11	62392583	62392603	CAATATGAATGGGCTGATGG	0.685933	0.705249	0.851483	605000	GCAATATGAATGGGCTGATGGGTTTT	CCATCAGCCCATTCATATTGCGGTGT	AGCTAGTCCGGACAGACAGTGCNNNNNTANNNNNGCNNNNNTANNNNNGCATGCCCAAGAAGAAGAGGAAGGTGTC	CCTTTTCATGGTCAGTCCAAACA	AGCAAATGCGTCAGCTTTCTG	153	CCTTTTCATGGTCAGTCCAAACATTCATAAACTGTCTGTCTTTATAAACCTTCATTGGATCCTCCATCAGCCCATTCATATTGATGAATTTGACCCTTCTTTGTTCTGCATCAAACATCATAGGTGGAATCACAGAAAGCTGACGCATTTGCT
neomycin resistance cassette	Neo	#1	CG08301 (Neo.1 from Rogers et al., 2017)	CTAGGCTA	n/a	n/a	n/a	n/a	TCATGGCTGATGCAATGCGG	n/a	n/a	0.878	1030000	n/a	n/a	n/a	n/a	n/a	n/a	n/a
neomycin resistance cassette	Neo	#2	CG08302 (Neo.2 from Rogers et al., 2017)	AATGCTGG	n/a	n/a	n/a	n/a	GATATTGCTGAAGAGCTTGG	n/a	n/a	0.539	2325000	n/a	n/a	n/a	n/a	n/a	n/a	n/a
neomycin resistance cassette	Neo	#3	CG08303 (Neo.3 from Rogers et al., 2017)	ACGCATAC	n/a	n/a	n/a	n/a	GAATAGCCTCTCCACCCAAG	n/a	n/a	0.709	915000	n/a	n/a	n/a	n/a	n/a	n/a	n/a
ENSMUSG00000020716	Nf1	#1	CG02701	ACGTGTGT	1	chr11	79409441	79409461	CCAAACGTAAAGCAGCAGTG	0.74751	0.797352	0.880249	595000	GCCAAACGTAAAGCAGCAGTGGTTTT	CACTGCTGCTTTACGTTTGGCGGTGT	AGCTAGTCCGGAACGTGTGTGCNNNNNTANNNNNGCNNNNNTANNNNNGCATGCCCAAGAAGAAGAGGAAGGTGTC	TGTATTTTTCACAGAATGTGCAGAG	CGTCCACCACATCCTTGGAG	155	TGTATTTTTCACAGAATGTGCAGAGAAGCTGTTTGACTTGGTGGATGGTTTTGCAGAAAGCACCAAACGTAAAGCAGCAGTGTGGCCCCTACAAATCATTCTCCTTATCTTGTGTCCAGAAATAATCCAGGACATCTCCAAGGATGTGGTGGACG
ENSMUSG00000020716	Nf1	#2	CG02702	AATTGCCG	1	chr11	79547089	79547109	CTTCAACAACTCCCTCGATG	0.624476	0.717034	0.985346	820000	GCTTCAACAACTCCCTCGATGGTTTT	CATCGAGGGAGTTGTTGAAGCGGTGT	AGCTAGTCCGGAAATTGCCGGCNNNNNTANNNNNGCNNNNNTANNNNNGCATGCCCAAGAAGAAGAGGAAGGTGTC	CCCCAACTCCAACTTTAGAACA	ACAAGGGACCTGTGGCTACTA	159	CCCCAACTCCAACTTTAGAACAACATCTTATGTGGGACGACATTGCCATTTTAGCCCGCTACATGCTGATGCTGTCCTTCAACAACTCCCTCGATGTGGCGGCTCATCTGCCCTATCTCTTCCATGTTGTCACTTTCTTAGTAGCCACAGGTCCCTTGT
ENSMUSG00000009073	Nf2	#1	CG06001	ACTCTACC	-1	chr11	4806265	4806285	GCTTGGTATGCGGAGCACCG	0.74794	0.775539	0.991501	405000	GCTTGGTATGCGGAGCACCGGTTTT	CGGTGCTCCGCATACCAAGCGGTGT	AGCTAGTCCGGAACTCTACCGCNNNNNTANNNNNGCNNNNNTANNNNNGCATGCCCAAGAAGAAGAGGAAGGTGTC	TCTTTAAGGGTAGGGGAGGAGG	TTGCTGTCTTTTGGTAGGTGA	159	TCTTTAAGGGTAGGGGAGGAGGCATGAAGGACTATAAACCAAGGATGAAGCAGCCTCACCTGGCTCTGCCCCGGTGCTCCGCATACCAAGCCGTAATTCTCTCCTCCCACATTTCCGGAGTCATCTGATAGAGATTTATCACCTACCAAAAGACAGCAA
ENSMUSG00000009073	Nf2	#2	CG06002	CGATAGCT	-1	chr11	4848873	4848893	CGAGATGGAGTTCAACTGCG	0.735873	0.621414	0.938069	1240000	GCGAGATGGAGTTCAACTGCGGTTTT	CGCAGTTGAACTCCATCTCGCGGTGT	AGCTAGTCCGGACGATAGCTGCNNNNNTANNNNNGCNNNNNTANNNNNGCATGCCCAAGAAGAAGAGGAAGGTGTC	ACCAGACAGGCAGAGATTCCG	GAGCTTCAGCTCACTCAAGAGGAA	151	ACCAGACAGGCAGAGATTCCGCGGCTCTCCACTCACAGCCCGTCGGGGTCGGCGGCCGGTTACCTCGCAGTTGAACTCCATCTCGGCGTCCATGGTGACGATCCGCACCGTGAATGTCTTGGGCTGCTTCCTCTTGAGTGAGCTGAAGCTC
Non-targeting	NT	#1	CG08401 (NT from Rogers et al., 2017)	AGTTGCTC	n/a	n/a	n/a	n/a	GCGAGGTATTCGGCTCCGCG	n/a	n/a	0.975	1130000	n/a	n/a	n/a	n/a	n/a	n/a	n/a
Non-targeting	NT	#2	CG08402 (from Brunello lib, Doench 2016)	ACGTCGAA	n/a	n/a	n/a	n/a	GACGTAGCCTTCCGAAATAT	n/a	n/a	0.929	285000	n/a	n/a	n/a	n/a	n/a	n/a	n/a
Non-targeting	NT	#3	CG08403 (from Brunello lib, Doench 2016)	ACGCTAGA	n/a	n/a	n/a	n/a	GACTGAAATCCAAGGACTGT	n/a	n/a	0.562	170000	n/a	n/a	n/a	n/a	n/a	n/a	n/a
ENSMUSG00000007080	Pole	#1	CG03101	GAGCTTGA	1	chr5	110286391	110286411	TCCTGAGGAACAGTGGACGG	0.70319	0.65488	0.899753	1380000	GTCCTGAGGAACAGTGGACGGGTTTT	CCGTCCACTGTTCCTCAGGACGGTGT	AGCTAGTCCGGAGAGCTTGAGCNNNNNTANNNNNGCNNNNNTANNNNNGCATGCCCAAGAAGAAGAGGAAGGTGTC	GAGAGCGCGCCAAATTCTC	CTACCGCCAGCGCCTTG	152	GAGAGCGCGCCAAATTCTCCCCGGAGCCTGAGGGAGCTTTGGAGCGTCGCAATGGTCCTGAGGAACAGTGGACGGAGGCACCCCGAGCCGGGCGCGGATGGCGAAGGCAGCCGGTGAGAGCCGGTGTCCTGCTGCCAAGGCGCTGGCGGTAG
ENSMUSG00000007080	Pole	#2	CG03102	ACGTACAG	1	chr5	110295277	110295297	CATTATGGTCACCTACAATG	0.759699	0.679244	0.928661	920000	GCATTATGGTCACCTACAATGGTTTT	CATTGTAGGTGACCATAATGCGGTGT	AGCTAGTCCGGAACGTACAGGCNNNNNTANNNNNGCNNNNNTANNNNNGCATGCCCAAGAAGAAGAGGAAGGTGTC	TCCACTGACTTCTGTGGTTTGT	CCACCCTTCCCTGACACAAT	163	TCCACTGACTTCTGTGGTTTGTTGAGCTCAGGTCCATCTGATCCAGAGATGGTTTGAGCATATCCAGGAAACCAAACCTACCATTATGGTCACCTACAATGGGGATTTTTTTGACTGGTGAGTCTAGCTTCCTGTTGTGGGTAATTGTGTCAGGGAAGGGTGG
ENSMUSG00000013663	Pten	#1	CG06101	ATCGTTGG	1	chr19	32815458	32815478	CCTCCAATTCAGGACCCACG	0.763752	0.796551	0.916958	300000	GCCTCCAATTCAGGACCCACGGTTTT	CGTGGGTCCTGAATTGGAGGCGGTGT	AGCTAGTCCGGAATCGTTGGGCNNNNNTANNNNNGCNNNNNTANNNNNGCATGCCCAAGAAGAAGAGGAAGGTGTC	TTAACCACACAGATCCTCAGT	AGAACTCTACTTTGATATCACCACA	150	TTAACCACACAGATCCTCAGTTTGTGGTCTGCCAGCTAAAGGTGAAGATATATTCCTCCAATTCAGGACCCACGCGGCGGGAGGACAAGTTCATGTACTTTGAGTTCCCTCAGCCATTGCCTGTGTGTGGTGATATCAAAGTAGAGTTCT
ENSMUSG00000013663	Pten	#2	CG06102	ATCACGTG	1	chr19	32811754	32811774	TCACCTGGATTACAGACCCG	0.771556	0.611894	0.954436	135000	GTCACCTGGATTACAGACCCGGTTTT	CGGGTCTGTAATCCAGGTGACGGTGT	AGCTAGTCCGGAATCACGTGGCNNNNNTANNNNNGCNNNNNTANNNNNGCATGCCCAAGAAGAAGAGGAAGGTGTC	CTGGGCCTATCAGGGAGTCA	ACTTACTGCAAGTTCCGCCA	161	CTGGGCCTATCAGGGAGTCACAATTCCCAGTCAGAGGCGCTATGTATATTATTATAGCTACCTGCTAAAAAATCACCTGGATTACAGACCCGTGGCACTGCTGTTTCACAAGATGATGTTTGAAACTATTCCAATGTTCAGTGGCGGAACTTGCAGTAAGT
ENSMUSG00000028399	Ptprd	#1	CG06201	TGTCCATC	1	chr4	76084397	76084417	CTTGGTGCGGAGCACATCTG	0.657306	0.653172	0.900143	1570000	GCTTGGTGCGGAGCACATCTGGTTTT	CAGATGTGCTCCGCACCAAGCGGTGT	AGCTAGTCCGGATGTCCATCGCNNNNNTANNNNNGCNNNNNTANNNNNGCATGCCCAAGAAGAAGAGGAAGGTGTC	GGAACATCAGGCAGTTGCAC	CCTTTGTGTTAACCAATCGTGGG	151	GGAACATCAGGCAGTTGCACAGTAATCATGCCATCCAAGTTTGTCTTCCCAATGAAGGCAGGCTTGGTGCGGAGCACATCTGGGGCAGTCTTTGCTGTCACCCTATGCTGCAATCCACCAGCACTGTTCCCACGATTGGTTAACACAAAGG
ENSMUSG00000028399	Ptprd	#2	CG06202	TCTAGCTC	1	chr4	76107325	76107345	GCAATGGTATCTGATCGTGG	0.724916	0.741297	0.969911	115000	GCAATGGTATCTGATCGTGGGTTTT	CCACGATCAGATACCATTGCGGTGT	AGCTAGTCCGGATCTAGCTCGCNNNNNTANNNNNGCNNNNNTANNNNNGCATGCCCAAGAAGAAGAGGAAGGTGTC	CTTACCTCTTCTCCTTGATCCCC	CTTGTTTTTAGTACCAGGGCAGC	150	CTTACCTCTTCTCCTTGATCCCCATCTCTGTAGACTAGTTCATAGCTGGCAATGGTATCTGATCGTGGCGGTGTCCAAGACAGCAAAATACTTGTTTCAGATTCAGGTTCTGCTTTGAAGTTTAGTGGCTGCCCTGGTACTAAAAACAAG
ENSMUSG00000021549	Rasa1	#1	CG06301	ATTGGCGA	-1	chr13	85258376	85258396	TTATAAGAGAGAGTGATCGG	0.772857	0.656218	0.939862	96000	GTTATAAGAGAGAGTGATCGGGTTTT	CCGATCACTCTCTCTTATAACGGTGT	AGCTAGTCCGGAATTGGCGAGCNNNNNTANNNNNGCNNNNNTANNNNNGCATGCCCAAGAAGAAGAGGAAGGTGTC	AAACTAGGAACAAAGACTTACCT	AACTATAGCAGAAGAACGCCTC	150	AAACTAGGAACAAAGACTTACCTAAAATGATTGACAACATTTGTCTGACTAAGGAATGAAAGTACAAAGGACCCCGGCCTCCGATCACTCTCTCTTATAAGATAGCTTCCAGATTTCCCTGCCTGCCTGAGGCGTTCTTCTGCTATAGTT
ENSMUSG00000021549	Rasa1	#2	CG06302	ATAGCACG	-1	chr13	85288792	85288812	GTGCCGGGTCAAGTTACCCG	0.739284	0.618554	1	545000	GTGCCGGGTCAAGTTACCCGGTTTT	CGGGTAACTTGACCCGGCACGGTGT	AGCTAGTCCGGAATAGCACGGCNNNNNTANNNNNGCNNNNNTANNNNNGCATGCCCAAGAAGAAGAGGAAGGTGTC	CAACCAAGTCGGCGTCC	GCGGGCAGTGAGGAA	157	CAACCAAGTCGGCGTCCGCCAGCCCGGGACACGGGGCGGCTGCCACCGGCAGGGCCGCGGGTAACTTGACCCGGCACGCTGCCGAGTAGGCGCTGGAGCCCGTGGCCGCGCCGCCGCCGGGGCCCGCCGTCGCAGGGCCGCCTTCCTCACTGCCCGC
ENSMUSG00000022105	Rb1	#1	CG03304 (from Rogers et al., 2017)	TCATGAGC	1	chr14	73322010	73322030	TCTTACCAGGATTCCATCCA	0.595529	0.711312	0.7504	355000	n/a	n/a	n/a	CAGAGGGTACTCTTGGATAGTGAA	AGGTACCCGATCATGTCAGAGA	167	CAGAGGGTACTCTTGGATAGTGAAATTATCACTAACTTTATATATTTTACTTTATAGATTTTCTTTTTAAAAAATTAACTTTAAAAGCATTCTTACCAGGATTCCATCCACGGATGAAACTTTCTCCCAAGTTAGCCAAGCTCTTTCTCTGACATGATCGGGTACCT
ENSMUSG00000022105	Rb1	#2	CG03301	GAGAACTC	1	chr14	73262663	73262683	TACGTTCAGAATCCACGGGA	0.669437	0.758282	0.976133	990000	GTACGTTCAGAATCCACGGGAGTTTT	TCCCGTGGATTCTGAACGTACGGTGT	AGCTAGTCCGGAGAGAACTCGCNNNNNTANNNNNGCNNNNNTANNNNNGCATGCCCAAGAAGAAGAGGAAGGTGTC	TCTTGTCAAGTTGGCTTCCA	ATTGACACATTTTTCCTCTTGTT	162	TCTTGTCAAGTTGGCTTCCACTTTGATAAAACTTTCAATCACTTTGTAAAAATCAAAGGCTTTTAAATTAAGTACGTTCAGAATCCACGGGAAGGACAAATCTGTTCCAGAATCAAGATGCTGCAATGTACTTCCTAAAAACAAGAGGAAAAATGTGTCAAT
ENSMUSG00000031060	Rbm10	#1	CG06404 (from Rogers et al., 2017)	GCTCACTT	1	chrX	20639417	20639437	GTATTTCCTGAACAGATCCG	0.715534	0.59524	0.912528	900000	n/a	n/a	n/a	CTTGAGCTGGCCTCACATACT	GAAAGCTCACCTGAGGATTTGT	150	CTTGAGCTGGCCTCACATACTCAGCCGCTTTCTTTGCTGAACATAGCCTGCTTCTGTATTTCCTGAACAGATCCGTGGACAGCTGCAGTCCCATGGTGTCCAAGCACGGGAGGTCCGGCTGATGCGGAACAAATCCTCAGGTGAGCTTTC
ENSMUSG00000031060	Rbm10	#2	CG06401	ACCTTAGG	-1	chrX	20639499	20639519	TGGGAACGAAAGCTCACCTG	0.744692	0.650893	0.796032	665000	GTGGGAACGAAAGCTCACCTGGTTTT	CAGGTGAGCTTTCGTTCCCACGGTGT	AGCTAGTCCGGAACCTTAGGGCNNNNNTANNNNNGCNNNNNTANNNNNGCATGCCCAAGAAGAAGAGGAAGGTGTC	GCTGAACATAGCCTGCTTCTG	CGGAGGCTCAGGCTGG	158	GCTGAACATAGCCTGCTTCTGTATTTCCTGAACAGATCCGTGGACAGCTGCAGTCCCATGGTGTCCAAGCACGGGAGGTCCGGCTGATGCGGAACAAATCCTCAGGTGAGCTTTCGTTCCCAGTGCCCTCCCCTTTTGCTGGCCAGCCTGAGCCTCCG
ENSMUSG00000034177	Rnf43	#1	CG03401	AACACAGG	1	chr11	87729466	87729486	GTAGACGAGCCCGAGCCGAG	0.700437	0.769751	0.978442	670000	GTAGACGAGCCCGAGCCGAGGTTTT	CTCGGCTCGGGCTCGTCTACGGTGT	AGCTAGTCCGGAAACACAGGGCNNNNNTANNNNNGCNNNNNTANNNNNGCATGCCCAAGAAGAAGAGGAAGGTGTC	CCAGGATCCTCTTCAGCAGCG	GAACTCTTCTAGACAGATGGCACA	154	CCAGGATCCTCTTCAGCAGCGGACAGCCCGGGCCATCAGCCAGCTGGCCACCAGGAGGTACCAAGCCGGCTGTAGACGAGCCCGAGCCGAGTGGCCAGACTCGGGGAGTAGCTGCAGCTCGACCCCCGTGTGTGCCATCTGTCTAGAAGAGTTC
ENSMUSG00000034177	Rnf43	#2	CG03402	ACGGAACA	-1	chr11	87729520	87729540	TAGACAGATGGCACACACGG	0.75415	0.676883	0.905757	1370000	GTAGACAGATGGCACACACGGGTTTT	CCGTGTGTGCCATCTGTCTACGGTGT	AGCTAGTCCGGAACGGAACAGCNNNNNTANNNNNGCNNNNNTANNNNNGCATGCCCAAGAAGAAGAGGAAGGTGTC	GCCACCAGGAGGTACCAAG	CCAGGTACCCTCCCCATCTC	158	GCCACCAGGAGGTACCAAGCCGGCTGTAGACGAGCCCGAGCCGAGTGGCCAGACTCGGGGAGTAGCTGCAGCTCGACCCCCGTGTGTGCCATCTGTCTAGAAGAGTTCTCAGAGGGGCAGGTGAGATGGGCCCGGCTGGAGATGGGGAGGGTACCTGG
ENSMUSG00000044791	Setd2	#1	CG03704 (from Rogers et al., 2017)	TTGCATCG	-1	chr9	110550354	110550374	TCTCTAATCCATCTTCCCAG	0.788147	0.641273	0.701555	755000	n/a	n/a	n/a	CTACTTTGCCCATGGAAGAGACA	TTTCAGTTTGAGAACAGCCTTTAC	150	CTACTTTGCCCATGGAAGAGACAAGTCCCTGTTCTTCTCGGAGCAGTCAGAGCTACAAACATTATTCTGACCGCTGGGAAGATGGATTAGAGACCAGGAGACATGCATATGAGGAAGAGTATGAGAGTAAAGGCTGTTCTCAAACTGAAA
ENSMUSG00000044791	Setd2	#2	CG03701	TGGTCCTT	-1	chr9	110573719	110573739	CCGTCTCCTTCACTTAACTG	0.725427	0.746775	0.946742	775000	GCCGTCTCCTTCACTTAACTGGTTTT	CAGTTAAGTGAAGGAGACGGCGGTGT	AGCTAGTCCGGATGGTCCTTGCNNNNNTANNNNNGCNNNNNTANNNNNGCATGCCCAAGAAGAAGAGGAAGGTGTC	TGGAAGAAAGCAAAGTACTTCCAA	CATTTCCGTGCTCGGCTTG	161	TGGAAGAAAGCAAAGTACTTCCAATTATTCAGCGCTGGTCTCAAACTAAGACTGCTGTTCCTCAGTTAAGTGAAGGAGACGGGTATTCTAGTGAGAATACATCACGTGCTCACACACCGCTTAATACACCGGACCCTTCTGCCAAGCCGAGCACGGAAATG
ENSMUSG00000024515	Smad4	#1	CG03801	GCAATGCT	1	chr18	73675901	73675921	AGACGGGCATAGATCACATG	0.74074	0.661741	0.967433	4320000	GAGACGGGCATAGATCACATGGTTTT	CATGTGATCTATGCCCGTCTCGGTGT	AGCTAGTCCGGAGCAATGCTGCNNNNNTANNNNNGCNNNNNTANNNNNGCATGCCCAAGAAGAAGAGGAAGGTGTC	AAGTCAAACGCATACTGACAA	TGGGTAGTAAGTCATGCAAGGA	169	AAGTCAAACGCATACTGACAATATTTAACATGCTTTAGTTCATTCTTGTGTAGATCAGGCCACCTCCACAGACGGGCATAGATCACATGAGGAAATCCTTTCCGACCAGCCACCTAGGAAAAGAAACGATCATTTATTAAGTGTAAGTCCTTGCATGACTTACTACCCA
ENSMUSG00000024515	Smad4	#2	CG03802	GAGGTGTT	-1	chr18	73677823	73677843	GATGTGTCATAGACAAGGTG	0.678372	0.696623	0.828959	90000	GATGTGTCATAGACAAGGTGGTTTT	CACCTTGTCTATGACACATCGGTGT	AGCTAGTCCGGAGAGGTGTTGCNNNNNTANNNNNGCNNNNNTANNNNNGCATGCCCAAGAAGAAGAGGAAGGTGTC	TTTCTCTTTCAGCTTCTTTACCA	TGTCTATAACAAATACACCAACAAG	140	TTTCTCTTTCAGCTTCTTTACCAAACTCTCAATTGCTCTTTTTGCAAAGGTTTCACTTTCCCCACCTTGTCTATGACACATCAAACTATGTACAATGCTCAGACAGGCATCGTTACTTGTTGGTGTATTTGTTATAGACA
ENSMUSG00000032187	Smarca4	#1	CG03901	ACAATCCG	-1	chr9	21635936	21635956	GGGATGCAGGTCTTACCATG	0.780987	0.63996	0.813654	500000	GGGATGCAGGTCTTACCATGGTTTT	CATGGTAAGACCTGCATCCCGGTGT	AGCTAGTCCGGAACAATCCGGCNNNNNTANNNNNGCNNNNNTANNNNNGCATGCCCAAGAAGAAGAGGAAGGTGTC	GCCACAGGACCCGGA	AGTCAGGGTTGCCTGTCATTA	155	GCCACAGGACCCGGACCTGGACCCGGCCCTGGCCCTGGCCCTGGCCCAGGACCAGCCCCTCCAAATTACAGTAGACCCCATGGTAAGACCTGCATCCCTGCTCCTGGAGTGGGGAGAATGCTCAATGTGGATGATAATGACAGGCAACCCTGACT
ENSMUSG00000032187	Smarca4	#2	CG03902	TGGTTCCA	-1	chr9	21637314	21637334	CGGAGGAATCAGCTTCTGTG	0.711462	0.723261	0.852026	295000	GCGGAGGAATCAGCTTCTGTGGTTTT	CACAGAAGCTGATTCCTCCGCGGTGT	AGCTAGTCCGGATGGTTCCAGCNNNNNTANNNNNGCNNNNNTANNNNNGCATGCCCAAGAAGAAGAGGAAGGTGTC	GGTCAAGCAGCACACTCCTC	GGGGACTGTGTTTGTGGTGG	171	GGTCAAGCAGCACACTCCTCTTGCCTCTCCAGGACCCATGGCCAATGCTGCTGCCCCCACAAGCACCCCACAGAAGCTGATTCCTCCGCAACCAACAGGCCGTCCTTCACCTGCACCTCCTGCTGTCCCGCCTGCTGCCTCACCTGTAATGCCACCACAAACACAGTCCCC
ENSMUSG00000025862	Stag2	#1	CG08801	GCAACAAG	1	chrX	42217354	42217374	CGAGTCCTACAAGCATGACC	0.650679	0.566455	0.947161	270000	GCGAGTCCTACAAGCATGACCGTTTT	GGTCATGCTTGTAGGACTCGCGGTGT	AGCTAGTCCGGAGCAACAAGGCNNNNNTANNNNNGCNNNNNTANNNNNGCATGCCCAAGAAGAAGAGGAAGGTGTC	GCTTCATAGACAATGATTAAAAGGA	ATTTTACCTTTGCAGCCTGAG	150	GCTTCATAGACAATGATTAAAAGGACTGGTTTTCCTTCCATTCTAGTCGGTGGTAGATGACTGGATCGAGTCCTACAAGCATGACCGGGACATAGCGCTTCTTGACCTTATCAATTTCTTTATTCAGTGCTCAGGCTGCAAAGGTAAAAT
ENSMUSG00000025862	Stag2	#2	CG08802	CCTGAATC	-1	chrX	42217375	42217395	GGTCAAGAAGCGCTATGTCC	0.612049	0.59961	0.983144	865000	GGTCAAGAAGCGCTATGTCCGTTTT	GGACATAGCGCTTCTTGACCGGTGT	AGCTAGTCCGGACCTGAATCGCNNNNNTANNNNNGCNNNNNTANNNNNGCATGCCCAAGAAGAAGAGGAAGGTGTC	CCTTCCATTCTAGTCGGTGGT	GTGGCTATTTGAGAGCTTACGA	154	CCTTCCATTCTAGTCGGTGGTAGATGACTGGATCGAGTCCTACAAGCATGACCGGGACATAGCGCTTCTTGACCTTATCAATTTCTTTATTCAGTGCTCAGGCTGCAAAGGTAAAATATATTTATTTTACAATCGTAAGCTCTCAAATAGCCAC
ENSMUSG00000003068	Lkb1	#1	CG06504 (from Rogers et al., 2017)	ACCTCTAC	-1	chr10	80126743	80126763	GTGGTGGGCCGCAGTCACAA	0.720462	0.655661	0.959078	1310000	n/a	n/a	n/a	ACAAGCTCTTTGAGAACATTGGG	AGGTCAGAACCCCTCCAGAC	154	ACAAGCTCTTTGAGAACATTGGGAGAGGAGACTTCACCATCCCTTGTGACTGCGGCCCACCACTCTCTGACCTACTCCGAGGTGGGCATCTCTAAATCACCCAAATGTTAGGACAGCAAGGGACAGAGCCCCTGGTCTGGAGGGGTTCTGACCT
ENSMUSG00000003068	Lkb1	#2	CG06501	GCTCTAGT	1	chr10	80126759	80126779	CCACTCTCTGACCTACTCCG	0.772178	0.62643	0.947522	1215000	GCCACTCTCTGACCTACTCCGGTTTT	CGGAGTAGGTCAGAGAGTGGCGGTGT	AGCTAGTCCGGAGCTCTAGTGCNNNNNTANNNNNGCNNNNNTANNNNNGCATGCCCAAGAAGAAGAGGAAGGTGTC	ACAAGCTCTTTGAGAACATTGGG	AGGTCAGAACCCCTCCAGAC	154	ACAAGCTCTTTGAGAACATTGGGAGAGGAGACTTCACCATCCCTTGTGACTGCGGCCCACCACTCTCTGACCTACTCCGAGGTGGGCATCTCTAAATCACCCAAATGTTAGGACAGCAAGGGACAGAGCCCCTGGTCTGGAGGGGTTCTGACCT
ENSMUSG00000040943	Tet2	#1	CG06601	TCTACTGG	1	chr3	133487876	133487896	GGAGAAATTGATCTGCGCTG	0.743486	0.64659	0.939862	95000	GGAGAAATTGATCTGCGCTGGTTTT	CAGCGCAGATCAATTTCTCCGGTGT	AGCTAGTCCGGATCTACTGGGCNNNNNTANNNNNGCNNNNNTANNNNNGCATGCCCAAGAAGAAGAGGAAGGTGTC	AGCATCACAGGCCTTAGTCAC	CCGCATCTCATGTAAACACCC	161	AGCATCACAGGCCTTAGTCACCATTGCAGCTGGCTCTGGAGGCAGCTGCAAGCTTGAGGTCTGGGAGAAATTGATCTGCGCTGAGGTAAGCGATGGTTGAGGGATCTCGTGGGACAACTCGATAGCAGCCTGACTGCTAGGGGTGTTTACATGAGATGCGG
ENSMUSG00000040943	Tet2	#2	CG06602	TCACGTAG	-1	chr3	133488036	133488056	CATTCTGAGGAGAACACACG	0.751378	0.666141	0.891003	1385000	GCATTCTGAGGAGAACACACGGTTTT	CGTGTGTTCTCCTCAGAATGCGGTGT	AGCTAGTCCGGATCACGTAGGCNNNNNTANNNNNGCNNNNNTANNNNNGCATGCCCAAGAAGAAGAGGAAGGTGTC	ATGAGATGCGGTACTCTGCAC	GGAAAAAGGCAGGAGCGTTAC	166	ATGAGATGCGGTACTCTGCACGGCAATGGAGACACAATCTGGATAACACTGTGTTTTTTCCAGGAGTTCACCACGTGTGTTCTCCTCAGAATGGGCAGAAACTGTAGCACCATTAGGCATTAGCACAATCTTGTTTTTAAGTAATGTAACGCTCCTGCCTTTTTCC
ENSMUSG00000059552	p53	#1	CG04004 (from Rogers et al., 2017)	ATACAGGC	-1	chr11	69587447	69587467	AGGAGCTCCTGACACTCGGA	0.640592	0.62431	0.924217	345000	n/a	n/a	n/a	CCCATCCACAGCCATCACCT	TGACAGGGGCCATGGAGTG	179	CCCATCCACAGCCATCACCTCACTGCATGGACGATCTGTTGCTGCCCCAGGATGTTGAGGAGTTTTTTGAAGGCCCAAGTGAAGCCCTCCGAGTGTCAGGAGCTCCTGCAGCACAGGACCCTGTCACCGAGACCCCTGGGCCAGTGGCCCCTGCCCCAGCCACTCCATGGCCCCTGTCA
ENSMUSG00000059552	p53	#2	CG04001	CTACTCTC	1	chr11	69588479	69588499	GAAGTCACAGCACATGACGG	0.771819	0.608196	0.914626	645000	GAAGTCACAGCACATGACGGGTTTT	CCGTCATGTGCTGTGACTTCGGTGT	AGCTAGTCCGGACTACTCTCGCNNNNNTANNNNNGCNNNNNTANNNNNGCATGCCCAAGAAGAAGAGGAAGGTGTC	CCCTGTGCAGTTGTGGGTCA	GTTGAGGGCTTACCATCACCAT	150	CCCTGTGCAGTTGTGGGTCAGCGCCACACCTCCAGCTGGGAGCCGTGTCCGCGCCATGGCCATCTACAAGAAGTCACAGCACATGACGGAGGTCGTGAGACGCTGCCCCCACCATGAGCGCTGCTCCGATGGTGATGGTAAGCCCTCAAC
ENSMUSG00000059552	p53	#3	CG04002	ATTCGCTG	-1	chr11	69587380	69587400	AACAGATCGTCCATGCAGTG	0.720084	0.683012	0.807262	1120000	GAACAGATCGTCCATGCAGTGGTTTT	CACTGCATGGACGATCTGTTCGGTGT	AGCTAGTCCGGAATTCGCTGGCNNNNNTANNNNNGCNNNNNTANNNNNGCATGCCCAAGAAGAAGAGGAAGGTGTC	TTTGGTGTTGGGCTGGTAGG	CTGACACTCGGAGGGCTTC	151	TTTGGTGTTGGGCTGGTAGGCTGAGAACACAGTCCTGAGGGTTCTTCTTTGTCCCATCCACAGCCATCACCTCACTGCATGGACGATCTGTTGCTGCCCCAGGATGTTGAGGAGTTTTTTGAAGGCCCAAGTGAAGCCCTCCGAGTGTCAG
ENSMUSG00000026812	Tsc1	#1	CG06701	CAACGTGT	-1	chr2	28672501	28672521	ACCTAAGATCCACATACCAG	0.776183	0.659508	0.813818	1445000	GACCTAAGATCCACATACCAGGTTTT	CTGGTATGTGGATCTTAGGTCGGTGT	AGCTAGTCCGGACAACGTGTGCNNNNNTANNNNNGCNNNNNTANNNNNGCATGCCCAAGAAGAAGAGGAAGGTGTC	TGTGGTATGACCACTCCTCCT	CACATAGCCCCCAGAGTCAC	154	TGTGGTATGACCACTCCTCCTACGTCTCCTGGAAATGTCCCAGCTGATTTGTCACATCCGTATAGTAAAGCCTTTGGTACCACTGGTATGTGGATCTTAGGTGGACTTGATTGCTTGGTTTGGGCCTGTGTTTTGTGACTCTGGGGGCTATGTG
ENSMUSG00000026812	Tsc1	#2	CG06702	AGACTCCT	-1	chr2	28661662	28661682	ATCGTGTGGCTCCTGCAAGG	0.695133	0.635975	0.952525	210000	GATCGTGTGGCTCCTGCAAGGGTTTT	CCTTGCAGGAGCCACACGATCGGTGT	AGCTAGTCCGGAAGACTCCTGCNNNNNTANNNNNGCNNNNNTANNNNNGCATGCCCAAGAAGAAGAGGAAGGTGTC	GAACGTGGGCCTATGCTTGT	CACCCTCCAGTGACTGAGAATA	160	GAACGTGGGCCTATGCTTGTCAACACGTTGGTTGATTATTACCTGGAAACCAATTCTCAGCCGGTATTGCACATCCTGACCACCTTGCAGGAGCCACACGATAAGGTGAGTACTGGTGGGCTATCGTGGCCGTCTGTATATTCTCAGTCACTGGAGGGTG
ENSMUSG00000037487	Ubr5	#1	CG04101	TCAGCTTC	-1	chr15	38041449	38041469	AGTGAATCTTACCTGCCGGG	0.748349	0.678159	0.939909	220000	GAGTGAATCTTACCTGCCGGGGTTTT	CCCGGCAGGTAAGATTCACTCGGTGT	AGCTAGTCCGGATCAGCTTCGCNNNNNTANNNNNGCNNNNNTANNNNNGCATGCCCAAGAAGAAGAGGAAGGTGTC	AGCAACCTGTATAGCTTCCAAATGA	CTGAGCCGGGATGATGAGGA	169	AGCAACCTGTATAGCTTCCAAATGACAATTATCATCAACTATAAACTCCCAAGCTCAGTCGAAGGATCACCCAAGCAGGAGCAGGGAGAGCAAAGCACTGACCTCCCGGCAGGTAAGATTCACTGGCTGTGTCATCACCGTCATCTCCATCCTCATCATCCCGGCTCAG
ENSMUSG00000037487	Ubr5	#2	CG04102	CTAGATGG	1	chr15	38047594	38047614	GCCTGCTCCAGTACATTCAG	0.724917	0.624021	0.881335	310000	GCCTGCTCCAGTACATTCAGGTTTT	CTGAATGTACTGGAGCAGGCGGTGT	AGCTAGTCCGGACTAGATGGGCNNNNNTANNNNNGCNNNNNTANNNNNGCATGCCCAAGAAGAAGAGGAAGGTGTC	TCATCTCCCCACCGTATGGTAAA	GAGCAGTTTTACTTGCATGCTTT	151	TCATCTCCCCACCGTATGGTAAATCATTTACCTCAAGAAGAAACGCGGCGTGATTGGGTCCCACCACACACTGTTTAATAGTAGCCTGCTCCAGTACATTCAGAGGTGGGTGGCTAGGGAACAAGAAAAAAGCATGCAAGTAAAACTGCTC
ENSMUSG00000031583	Wrn	#1	CG04201	TATGGCCA	-1	chr8	33320580	33320600	AAACCTAAATAGTGACGTGG	0.66139	0.771652	0.936959	615000	GAAACCTAAATAGTGACGTGGGTTTT	CCACGTCACTATTTAGGTTTCGGTGT	AGCTAGTCCGGATATGGCCAGCNNNNNTANNNNNGCNNNNNTANNNNNGCATGCCCAAGAAGAAGAGGAAGGTGTC	TTCCGTGTCCATCTTCCTCC	ACTGTATTGTCAGTGTTCTGCC	151	TTCCGTGTCCATCTTCCTCCTCAGGAGGAAGACGCCCATTGGTTCCCATTTCCAACCATGTAGAGTGAGTGGGTTCCACCACGTCACTATTTAGGTTTTCTAAAGACTGGAAGTTTAAAAGAAATTTGAGGCAGAACACTGACAATACAGT
ENSMUSG00000031583	Wrn	#2	CG04202	TTGCCACA	-1	chr8	33343669	33343689	GCGTCTGTCTGATGGCGATG	0.623002	0.627541	0.961397	265000	GCGTCTGTCTGATGGCGATGGTTTT	CATCGCCATCAGACAGACGCGGTGT	AGCTAGTCCGGATTGCCACAGCNNNNNTANNNNNGCNNNNNTANNNNNGCATGCCCAAGAAGAAGAGGAAGGTGTC	ACACAACTGGATCACTGCGA	AGGAAACATAGAAACATTCACGCA	153	ACACAACTGGATCACTGCGACTCTGCTTCTTTTCCCTGGCTTGTATATGGGCGGCCATTCCATGTCAAATCCCACCACATCGCCATCAGACAGACGCATGCTATCAAAGGAAAAATTGTGTGGATTAACTGCGTGAATGTTTCTATGTTTCCT
